# Supplementary material for: Influence of halogen bonding on gold(i)–ligand bond components and DFT characterization of a gold–iodine halogen bond
Source: Royal Society of Chemistry journal article supplement (doi:10.1039/c9cp03811f), 2019-01-01
Supplement: c9cp03811f2.pdf [file c9cp03811f2.pdf]

## Electronic Supporting Information

# Influence of Halogen Bonding on Gold(I)-Ligand Bond Components

*Edoardo Buttarazzi, Francesco Rosi, Gianluca Ciancaleoni\**

Dipartimento di Chimica e Chimica Industriale, Università degli Studi di Pisa, via Giuseppe Moruzzi  
13, Pisa 56124, Italy

\*e-mail: [gianluca.ciancaleoni@unipi.it](mailto:gianluca.ciancaleoni@unipi.it)

**Materials and Instrumentation.** Unless otherwise noted, all reagents were purchased from commercial sources and used without further purification.  $^1\text{H}$  and  $^{13}\text{C}$  NMR spectra were recorded with a Bruker AVANCE DRX400 spectrometer equipped with a BBFO broadband probe. Chemical shifts were measured in ppm ( $\delta$ ) from TMS by residual solvent peaks for  $^1\text{H}$  and  $^{13}\text{C}$ . All the reactions involving gold have been conducted protecting the flask from light with an aluminum foil. The precursor  $[(\text{NAC})\text{AuCl}]$  has been synthesized as described in literature.<sup>1</sup>

**Synthesis of  $1\text{BF}_4$ .**  $[(\text{NAC})\text{AuCl}]$  (100 mg, 0.259 mmol) and selenourea (32 mg, 0.259 mmol) were dissolved in dry dichloromethane, under Ar atmosphere, in a flask protected by light.  $\text{AgBF}_4$  (55.5 g, 0.285 mmol) were added, causing the immediate formation of a grey-white solid ( $\text{AgCl}$  and the excess of  $\text{AgBF}_4$ ). The mixture reaction was stirred for 30 minutes, then the solid was filtered off on a Celite pad and the volume of the solution was reduced to about 2 mL. Adding 5 mL of n-pentane caused the precipitation of a white solid with purple dots, which was filtered, washed with n-pentane (3 - 5 mL) and dried under vacuum. A small aliquot of the solid has been dissolved in 0.7 ml of  $\text{CDCl}_3$  passed through activated alumina, in order to remove acid impurities and water. The NMR spectrum of the white portion (see Figure S1) confirms the initial formation of the desired product: the two triplets at 4.0 and 3.3 ppm are typical of the  $\alpha$  protons of the pyrrolidine, together with the two multiplets around 2.0 ppm.<sup>2</sup> The singlet at 1.6 ppm is due to the tert-butyl group and the two broad signals 6.7 and 4.7 ppm are in agreement with a coordinated selenourea (if not coordinated, only one broad peak is present<sup>3</sup>). Anyway, the shape of the peaks underlines the presence of a second set of signals, likely due to the decomposition of the system. Indeed, the color of the solvent turned to purple, with the final formation of metallic gold in the tube and unidentified products in solution.

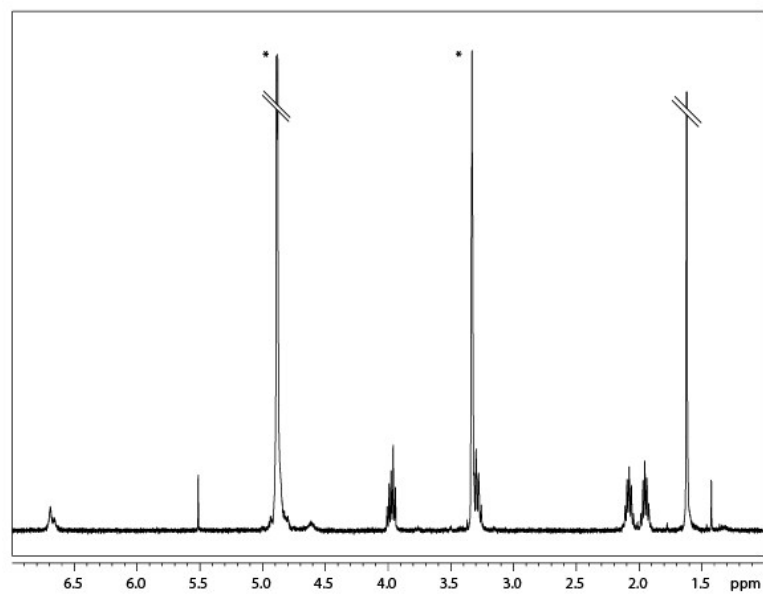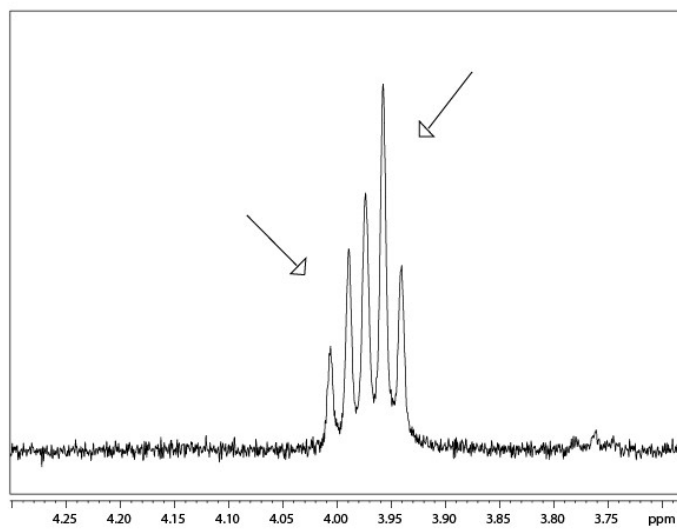

**Figure S1.** <sup>1</sup>H NMR spectrum of [(NAC)Au(SeU)]BF<sub>4</sub> in dry CDCl<sub>3</sub> (400 MHz, 23°C).

**Table S1.** Energy Decomposition Analysis results for the coordinative and noncovalent bonds.

| Compound    | Fragments                                                    | $E_{\text{int}}$ | $E_{\text{oi}}$ | $E_{\text{st}}$ | $E_{\text{disp}}$ |
|-------------|--------------------------------------------------------------|------------------|-----------------|-----------------|-------------------|
| <b>1</b>    | $[(\text{SeU})\text{Au}]^+ \cdots [\text{NAC}]$              | -98.6            | -78.8           | -14.0           | -9.9              |
|             | $[\text{SeU}] \cdots [\text{Au}(\text{NAC})]^+$              | -66.1            | -54.0           | -6.2            | -5.9              |
| <b>1-A1</b> | $[(\text{SeU})(\text{A1})\text{Au}]^+ \cdots [\text{NAC}]$   | -100.7           | -75.9           | -14.6           | -10.2             |
|             | $[(\text{SeU})(\text{A1})] \cdots [\text{Au}(\text{NAC})]^+$ | -62.1            | -53.6           | -1.3            | -7.1              |
|             | $[\text{A1}] \cdots [(\text{SeU})\text{Au}(\text{NAC})]^+$   | -4.4             | -3.5            | 3.3             | -4.1              |
| <b>1-A2</b> | $[(\text{SeU})(\text{A2})\text{Au}]^+ \cdots [\text{NAC}]$   | -101.3           | -76.2           | -14.6           | -10.5             |
|             | $[(\text{SeU})(\text{A2})] \cdots [\text{Au}(\text{NAC})]^+$ | -61.9            | -53.5           | -1.1            | -7.3              |
|             | $[\text{A2}] \cdots [(\text{SeU})\text{Au}(\text{NAC})]^+$   | -4.5             | -3.8            | 3.6             | -4.4              |
| <b>1-A3</b> | $[(\text{SeU})(\text{A3})\text{Au}]^+ \cdots [\text{NAC}]$   | -102.5           | -79.8           | -9.3            | -13.4             |
|             | $[\text{SeU}] \cdots [\text{Au}(\text{A3})(\text{NAC})]^+$   | -75.6            | -63.0           | -3.6            | -9.0              |
|             | $[\text{A3}] \cdots [\text{Au}(\text{SeU})(\text{NAC})]^+$   | -20.8            | -16.7           | 5.5             | -9.7              |
| <b>3</b>    | $[\text{ClAu}] \cdots [\text{NAC}]$                          | -85.7            | -66.7           | -10.1           | -8.9              |
|             | $[\text{Cl}]^- \cdots [\text{Au}(\text{NAC})]^+$             | -150.6           | -65.0           | -83.1           | -2.4              |
| <b>3A3</b>  | $[(\text{A3})\text{ClAu}] \cdots [\text{NAC}]$               | -92.6            | -70.0           | -13.3           | -9.4              |
|             | $[(\text{A3})\text{Cl}]^- \cdots [\text{Au}(\text{NAC})]^+$  | -126.7           | -57.4           | -64.9           | -4.4              |
|             | $[\text{A3}] \cdots [\text{ClAu}(\text{NAC})]$               | -13.4            | -12.0           | 2.3             | -3.7              |

**Table S2.** NOCV-CD analysis results.

| Compound    | Fragments                                                  | $\Delta\rho_0$ | $\Delta\rho_1$ | $\Delta\rho_2$ | $\Delta\rho_3$ | $\Delta\rho_{\text{tot,back}}$ |
|-------------|------------------------------------------------------------|----------------|----------------|----------------|----------------|--------------------------------|
| <b>1</b>    | $[(\text{SeU})\text{Au}]^+\cdots[\text{NAC}]$              | 0.359          | -0.049         | -0.030         | -0.013         | -0.092                         |
|             | $[\text{SeU}]\cdots[\text{Au}(\text{NAC})]^+$              | 0.346          | 0.024          | -0.021         | -0.016         | -0.037                         |
| <b>1-A1</b> | $[(\text{SeU})(\text{A1})\text{Au}]^+\cdots[\text{NAC}]$   | 0.364          | -0.046         | -0.030         | -0.010         | -0.086                         |
|             | $[(\text{SeU})(\text{A1})]\cdots[\text{Au}(\text{NAC})]^+$ | 0.343          | 0.020          | -0.021         | -0.015         | -0.036                         |
|             | $[\text{A1}]\cdots[(\text{SeU})\text{Au}(\text{NAC})]^+$   | -0.037         | 0.005          | -              | -              | -                              |
| <b>1-A2</b> | $[(\text{SeU})(\text{A2})\text{Au}]^+\cdots[\text{NAC}]$   | 0.372          | -0.040         | -0.030         | -0.010         | -0.080                         |
|             | $[(\text{SeU})(\text{A2})]\cdots[\text{Au}(\text{NAC})]^+$ | 0.344          | 0.020          | -0.021         | -0.015         | -0.036                         |
|             | $[\text{A2}]\cdots[(\text{SeU})\text{Au}(\text{NAC})]^+$   | -0.039         | 0.005          | -              | -              | -                              |
| <b>1-A3</b> | $[(\text{SeU})(\text{A3})\text{Au}]^+\cdots[\text{NAC}]$   | 0.375          | -0.044         | -0.027         | -0.010         | -0.081                         |
|             | $[\text{SeU}]\cdots[\text{Au}(\text{A3})(\text{NAC})]^+$   | 0.373          | 0.033          | -0.018         | -0.014         | -0.032                         |
|             | $[\text{A3}]\cdots[\text{Au}(\text{SeU})(\text{NAC})]^+$   | -0.106         | 0.024          | -              | -              | -                              |
| <b>3</b>    | $[\text{ClAu}]\cdots[\text{NAC}]$                          | 0.321          | -0.081         | -0.039         | -0.025         | -0.145                         |
|             | $[\text{Cl}]\cdots[\text{Au}(\text{NAC})]^+$               | 0.295          | 0.041          | 0.032          | -0.013         | -0.013                         |
| <b>3A3</b>  | $[(\text{A3})\text{ClAu}]\cdots[\text{NAC}]$               | 0.337          | -0.071         | -0.038         | -0.021         | -0.130                         |
|             | $[(\text{A3})\text{Cl}]\cdots[\text{Au}(\text{NAC})]^+$    | 0.275          | 0.025          | 0.024          | 0.003          | -                              |
|             | $[\text{A3}]\cdots[\text{ClAu}(\text{NAC})]$               | -0.105         | 0.004          | -              | -              | -                              |

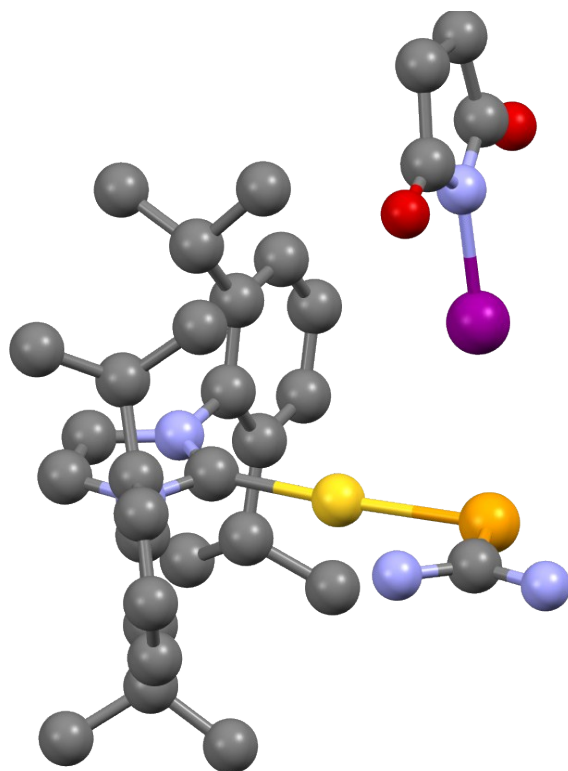

**Figure S2.** DFT-optimized geometry of **2A3**.

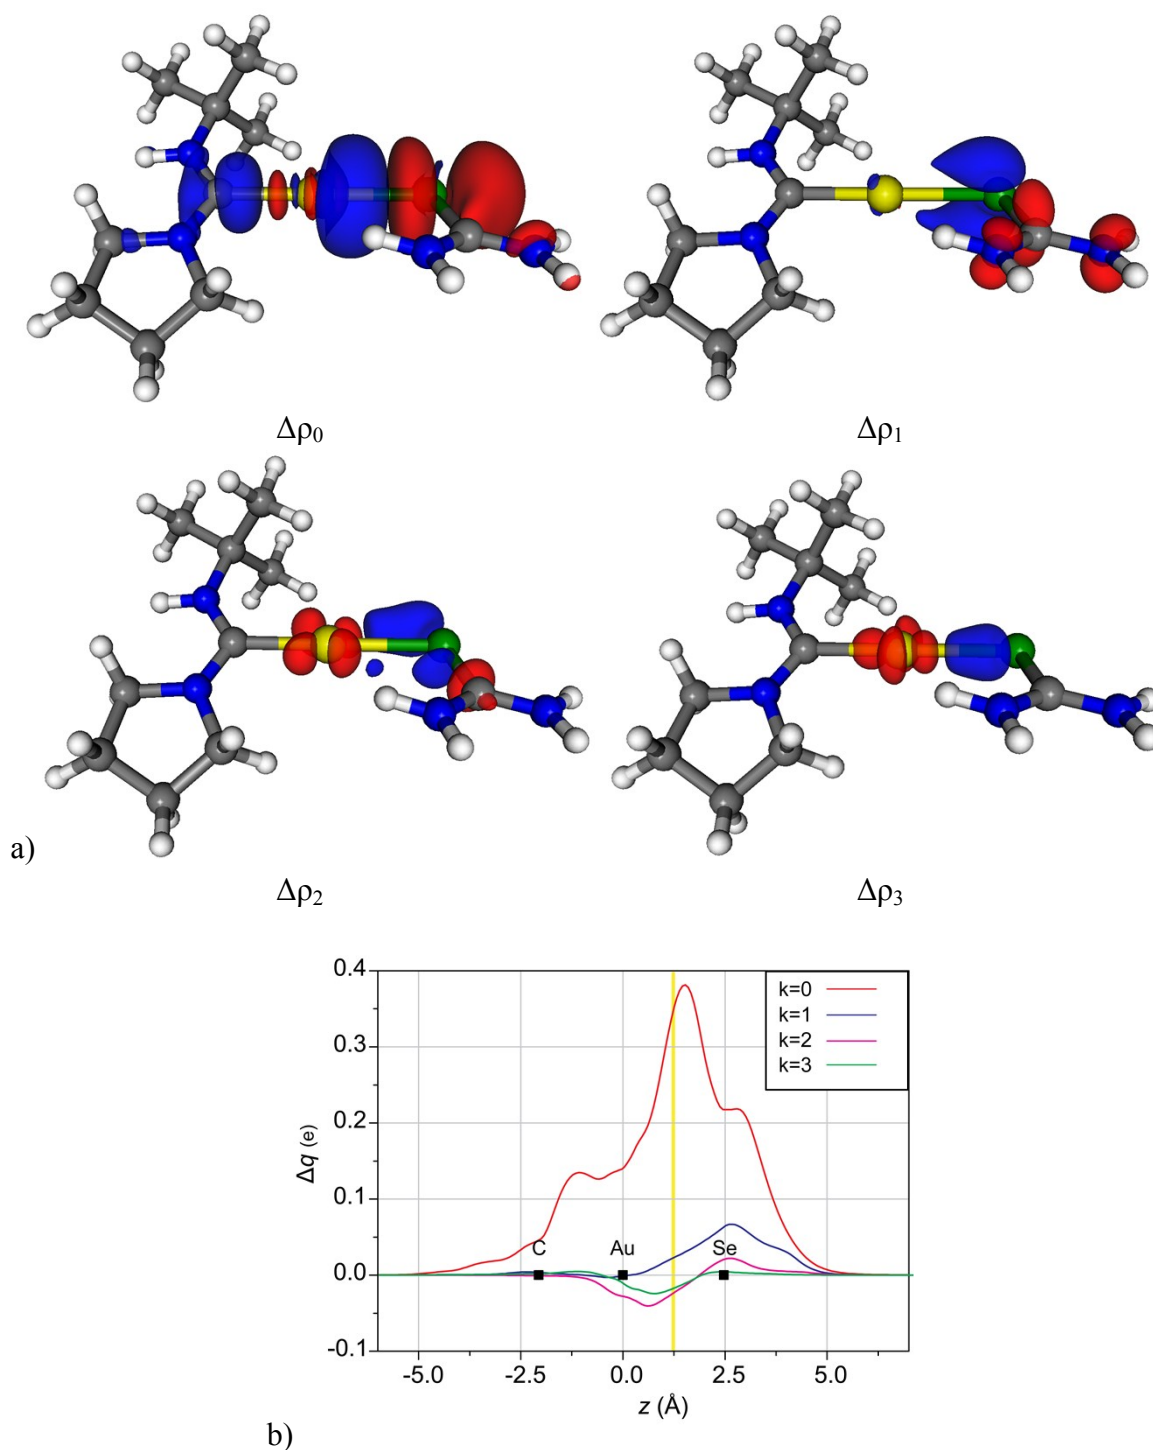

**Figure S3.** (a) Isodensity surfaces ( $\pm 1.5 \text{ me/au}$ ) for the most relevant  $\Delta\rho_k$  ( $k = 0 - 3$ ) for the  $[(\text{NAC})\text{Au}]^+ \cdots [\text{SeU}]$  bond in  $1^+$ . Blue and red regions indicate accumulation and depletion of electron density, respectively. (b) Most relevant  $\text{CD}_k$  curves for the  $[(\text{NAC})\text{Au}]^+ \cdots [\text{SeU}]$  bond in  $1^+$ . Black dots indicate the  $z$  position of the atomic nuclei. A yellow vertical band indicates the boundary between the fragments.

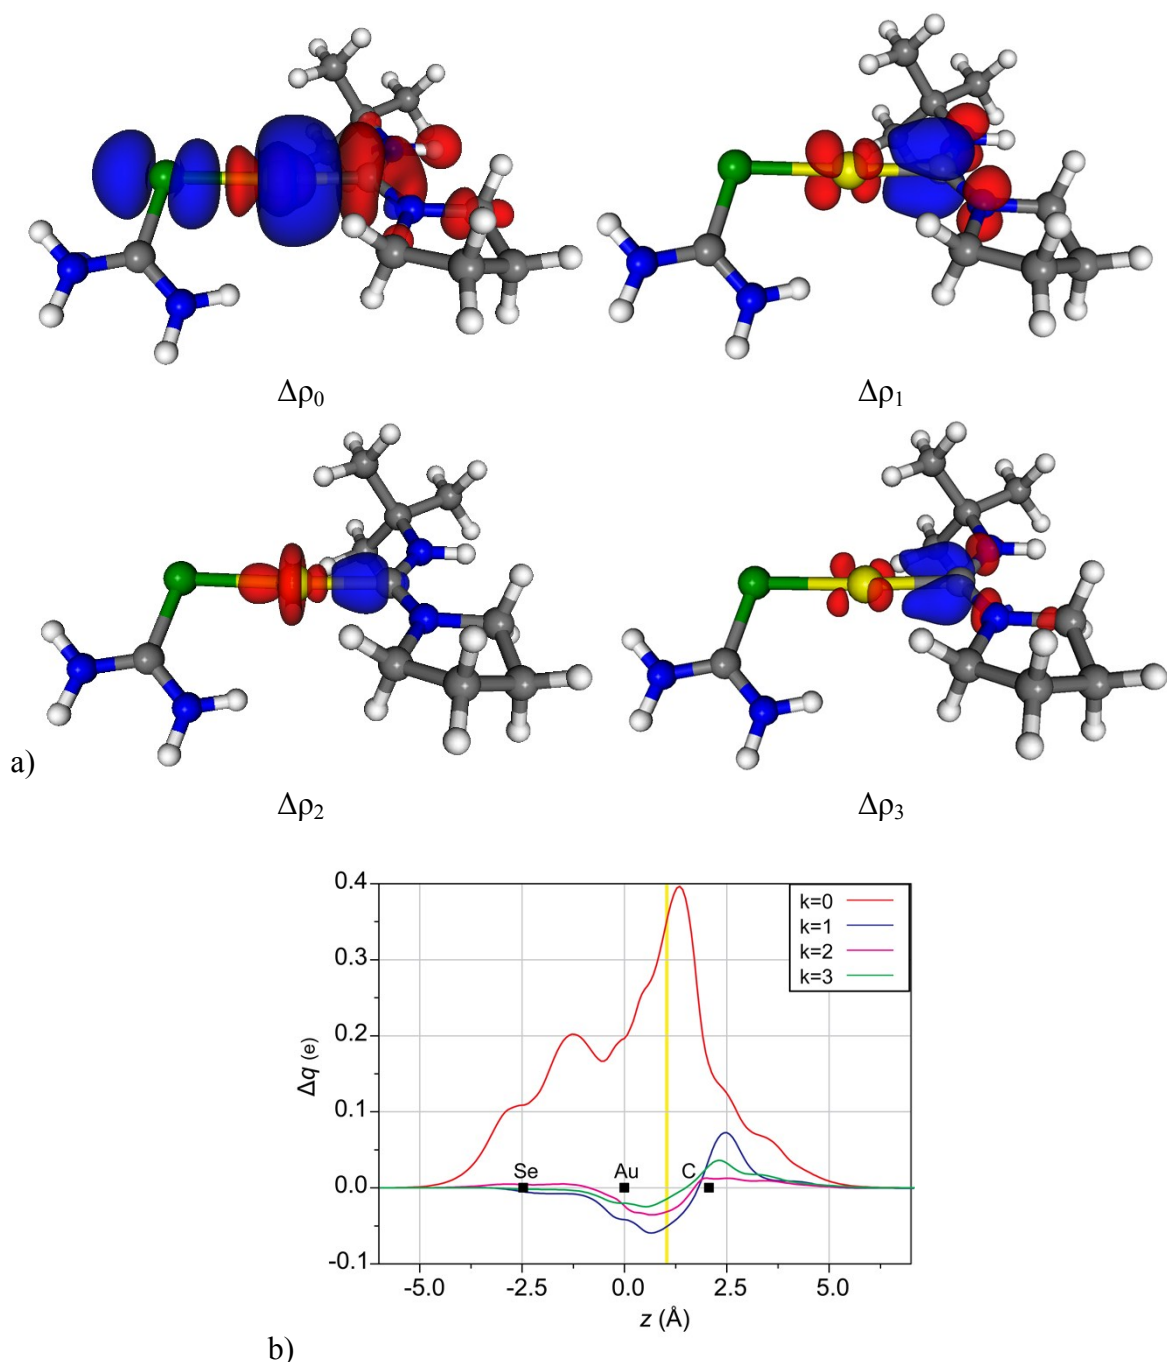

**Figure S4.** (a) Isodensity surfaces ( $\pm 1.5$  me/au) for the most relevant  $\Delta\rho_k$  ( $k = 0 - 3$ ) for the  $[(\text{SeU})\text{Au}]^+ \cdots [\text{NAC}]$  bond in  $\mathbf{1}^+$ . Blue and red regions indicate accumulation and depletion of electron density, respectively. (b) Most relevant  $\text{CD}_k$  curves for the  $[(\text{SeU})\text{Au}]^+ \cdots [\text{NAC}]$  bond in  $\mathbf{1}^+$ . Black dots indicate the  $z$  position of the atomic nuclei. A yellow vertical band indicates the boundary between the fragments.



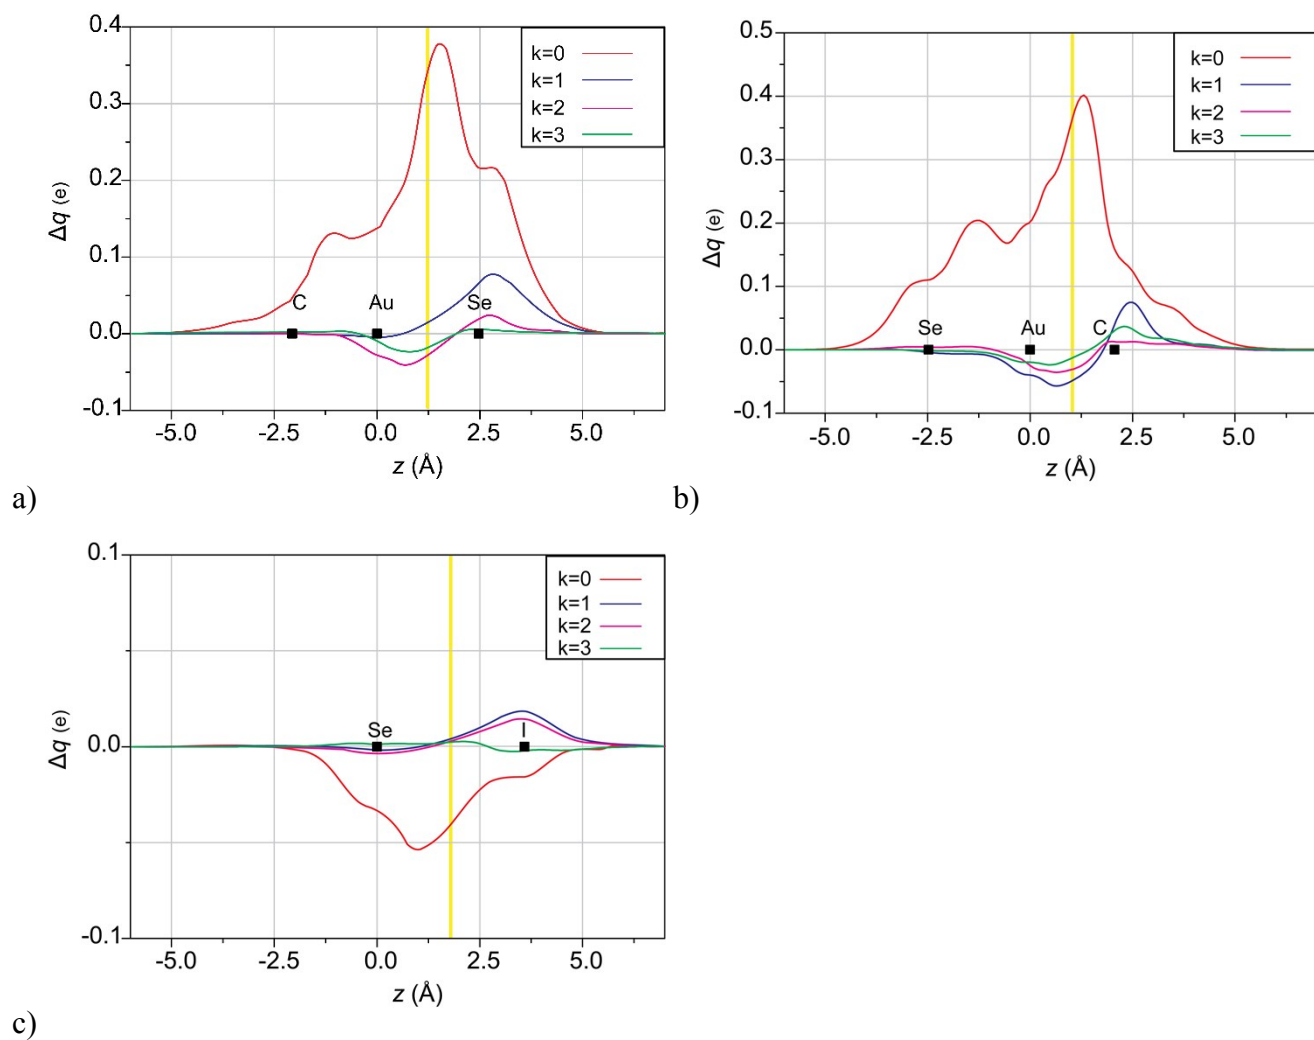

**Figure S5.** Most relevant CD<sub>k</sub> curves for the a)  $[(A1)(SeU)] \cdots [Au(NAC)]^+$  bond; b)  $[(A1)(SeU)Au]^+ \cdots [NAC]$  bond; c)  $[A1] \cdots [(SeU)Au(NAC)]^+$  bond in **1A1**. Black dots indicate the  $z$  position of the atomic nuclei. A yellow vertical band indicates the boundary between the fragments.

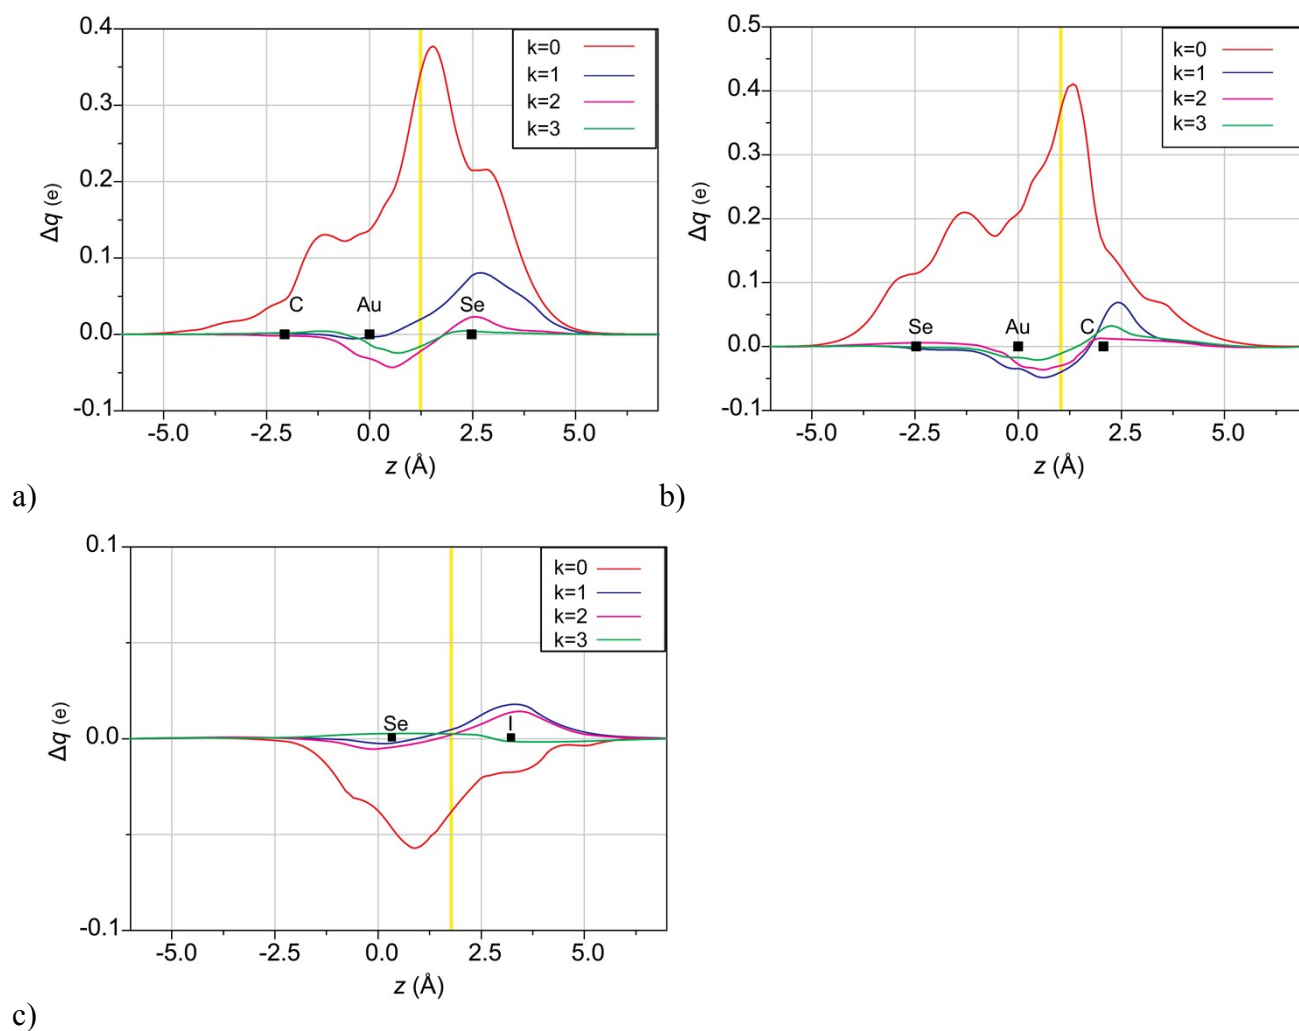

**Figure S6.** Most relevant  $CD_k$  curves for the a)  $[(A2)(SeU)] \cdots [Au(NAC)]^+$  bond; b)  $[(A2)(SeU)Au]^+ \cdots [NAC]$  bond; c)  $[A2] \cdots [(SeU)Au(NAC)]^+$  bond in **1A2**. Black dots indicate the  $z$  position of the atomic nuclei. A yellow vertical band indicates the boundary between the fragments.

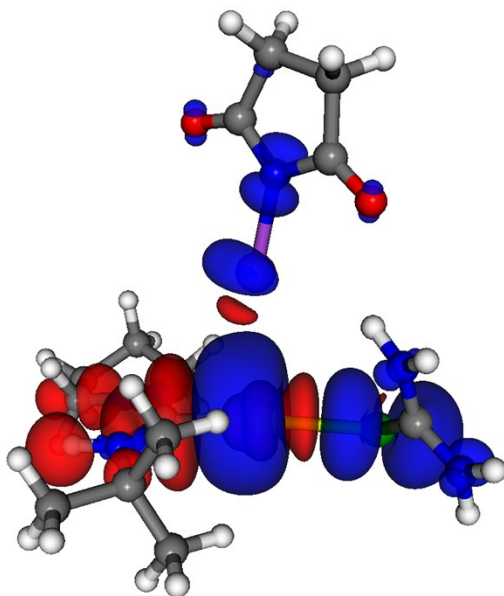

**Figure S7.** Isodensity surfaces ( $\pm 0.75$  me/au) for the most relevant  $\Delta\rho_k$  ( $k = 0 - 3$ ) for the  $[(\text{SeU})\text{Au}]^+\cdots[\text{NAC}]$  bond in  $\mathbf{1}^+$ . Blue and red regions indicate accumulation and depletion of electron density, respectively.

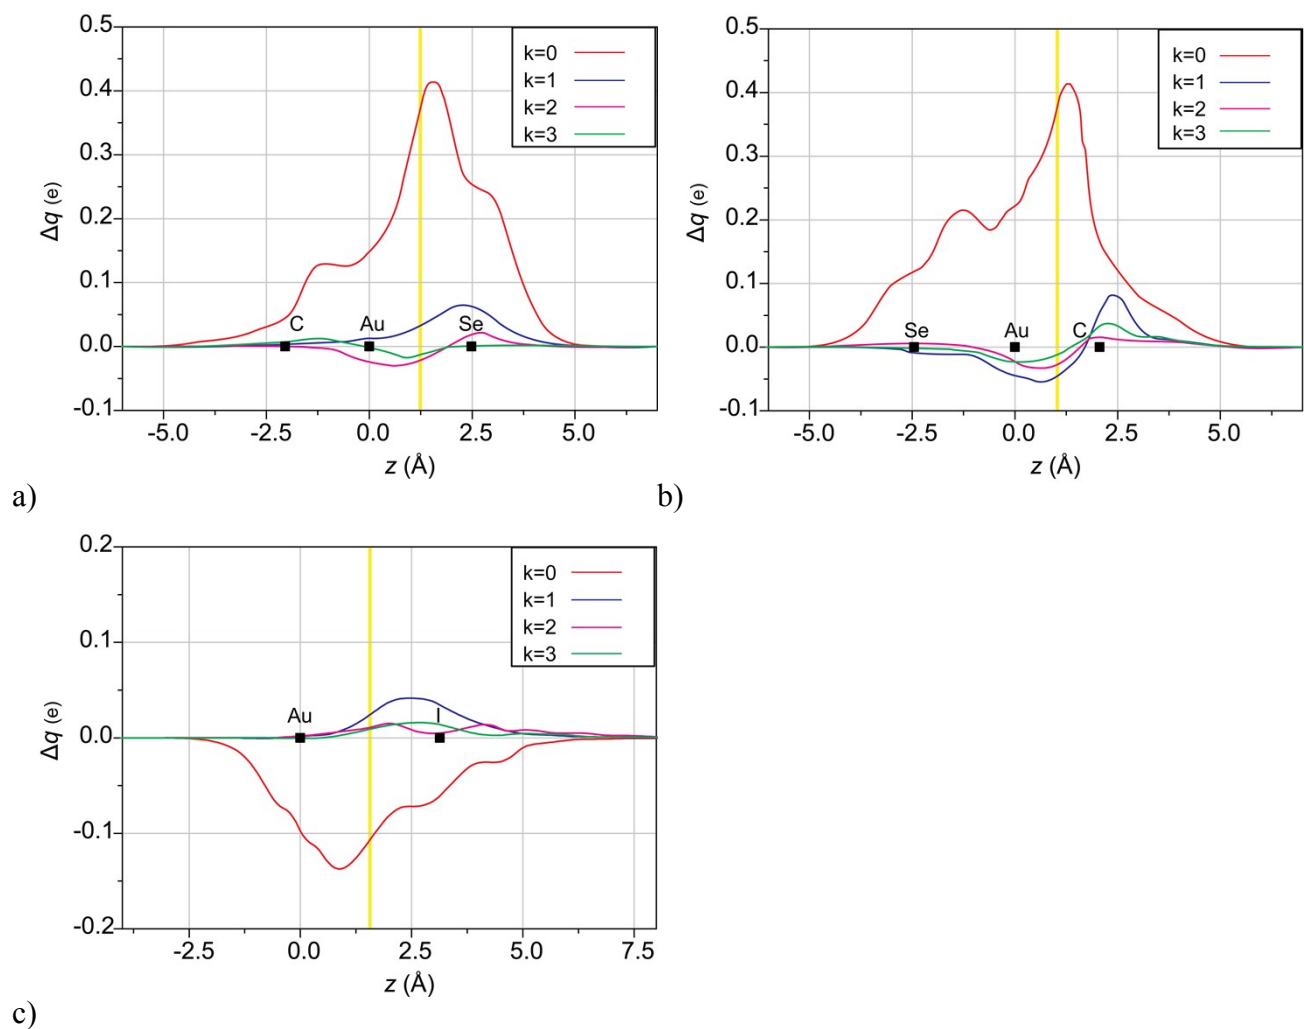

**Figure S8.** Most relevant  $CD_k$  curves for the a)  $[(A3)(SeU)] \cdots [Au(NAC)]^+$  bond; b)  $[(A3)(SeU)Au]^+ \cdots [NAC]$  bond; c)  $[A3] \cdots [(SeU)Au(NAC)]^+$  bond in **1A3**. Black dots indicate the  $z$  position of the atomic nuclei. A yellow vertical band indicates the boundary between the fragments.

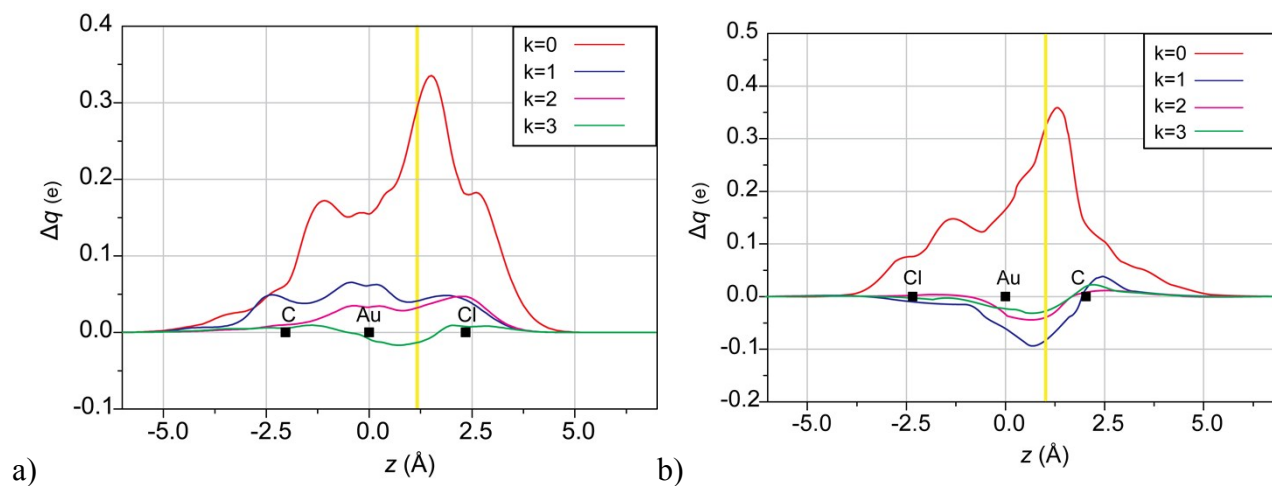

**Figure S9.** Most relevant CD<sub>k</sub> curves for the a) [Cl]<sup>-</sup>...[Au(NAC)]<sup>+</sup> bond; b) [ClAu]...[NAC] bond in **3**. Black dots indicate the z position of the atomic nuclei. A yellow vertical band indicates the boundary between the fragments.

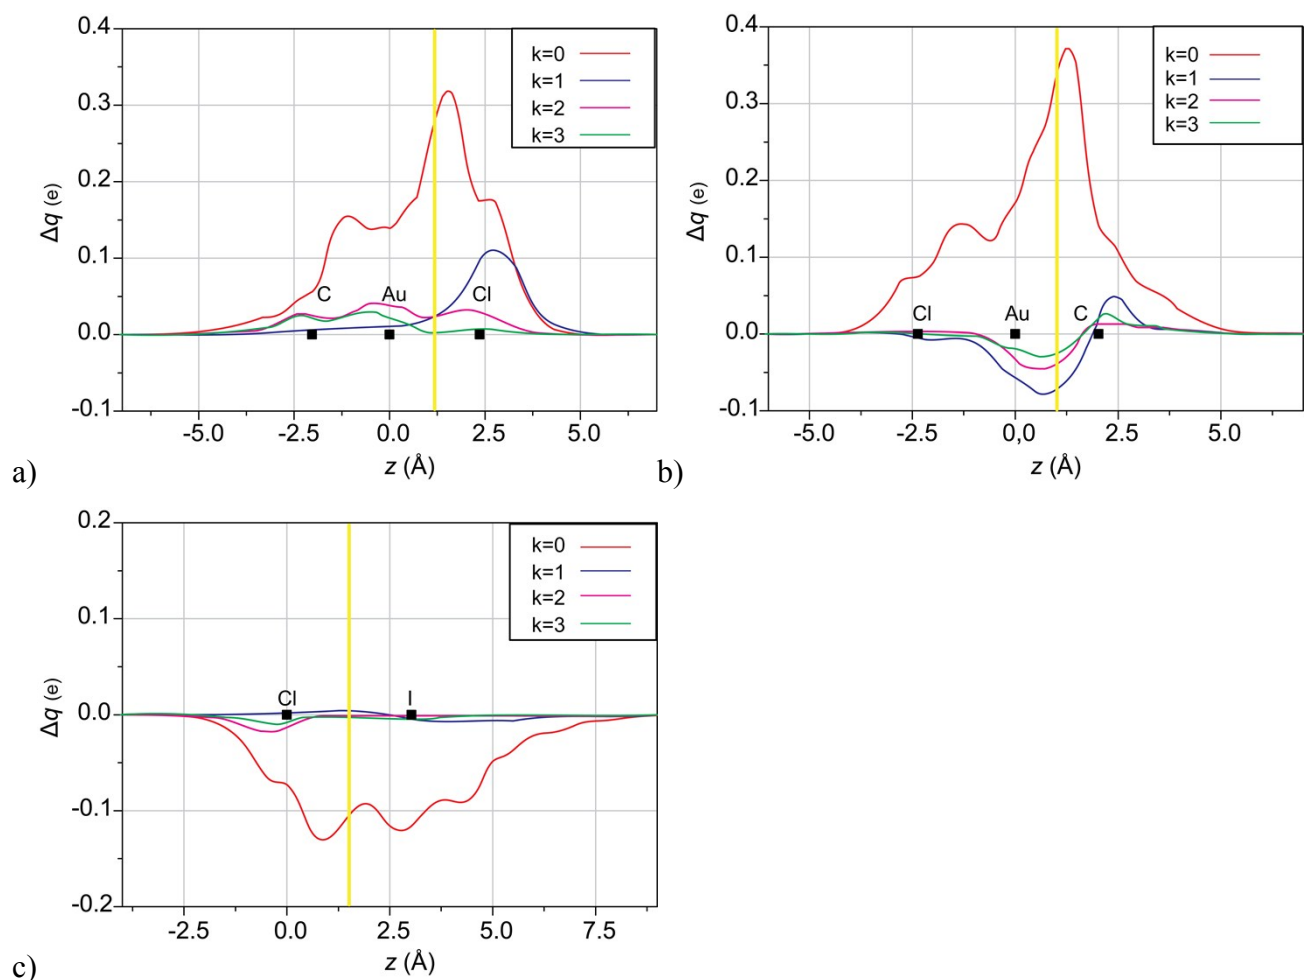

**Figure S10.** Most relevant CD<sub>k</sub> curves for the a) [(A3)(Cl)]<sup>-</sup>⋯[Au(NAC)]<sup>+</sup> bond; b) [(A3)(Cl)Au]<sup>-</sup>⋯[NAC] bond; c) [A3]<sup>-</sup>⋯[(Cl)Au(NAC)] bond in **3A3**. Black dots indicate the z position of the atomic nuclei. A yellow vertical band indicates the boundary between the fragments.

## List of coordinates for all the optimized geometries

38

1+

|   |                   |                   |                   |
|---|-------------------|-------------------|-------------------|
| C | -5.83961651993254 | 0.54395446572219  | 0.56396833644759  |
| C | -5.08430305251970 | -0.76482068831898 | 0.30538716123719  |
| C | -3.61194952543640 | -0.34712054196753 | 0.36169970379184  |
| N | -3.62065868531050 | 1.07646643389606  | -0.05280080172391 |
| C | -5.00697323401157 | 1.57653145781866  | -0.19343678690838 |
| C | -2.53248433941709 | 1.81357457903392  | -0.25979813727009 |
| N | -1.35352293782516 | 1.22074046775153  | -0.06000823159789 |
| C | 0.02834435691019  | 1.77307342315153  | -0.20676328627835 |
| C | 0.29644186460463  | 2.17568931230266  | -1.66297204402466 |
| C | 0.96391298409717  | 0.62116119036046  | 0.18443222288269  |
| C | 0.24635906179203  | 2.95329955973077  | 0.74817815673198  |
| H | -5.84351190303082 | 0.77713245211777  | 1.63151215094416  |
| H | -6.87163154207554 | 0.51774541643542  | 0.21564826180333  |
| H | -5.32519834383483 | -1.14802504366954 | -0.68886509104812 |
| H | -5.31105907149652 | -1.54376307943384 | 1.03226248347046  |
| H | -2.98726583985047 | -0.93915796547321 | -0.31075177395198 |
| H | -3.20792688567946 | -0.42961215922366 | 1.37559033129207  |
| H | -5.08560810512426 | 2.58206977406808  | 0.21562961360131  |
| H | -5.28202159679820 | 1.60100344823249  | -1.25215670557133 |
| H | 0.82655005581857  | -0.23839747183011 | -0.47666350170218 |
| H | 0.78526273340279  | 0.30413000270762  | 1.21487696791355  |
| H | 2.00189587864859  | 0.94467152605008  | 0.10558850364729  |
| H | 0.13261262171155  | 1.32881115780729  | -2.33234276327726 |
| H | 1.33213563075497  | 2.50456926298693  | -1.76837493596093 |
| H | -0.35153421015797 | 2.99523834743489  | -1.97918533190255 |

|    |                   |                  |                   |
|----|-------------------|------------------|-------------------|
| H  | -0.40938372793934 | 3.79242882151181 | 0.50713879618907  |
| H  | 1.27836690745055  | 3.30148656955109 | 0.67199474259760  |
| H  | 0.05721959242584  | 2.65473571528846 | 1.78132709646672  |
| H  | -1.36118582187562 | 0.25862015566820 | 0.25196262917237  |
| Au | -2.72635270489148 | 3.78005641795883 | -0.86237819187531 |
| Se | -2.88072091743010 | 6.16250594392783 | -1.51520168103603 |
| C  | -4.53268277390071 | 6.26728142530924 | -2.45085185502258 |
| N  | -4.97763899244254 | 7.47010087158706 | -2.78537005034442 |
| N  | -5.23169529506250 | 5.19275599792914 | -2.78244843209972 |
| H  | -4.87580958354316 | 4.27585598883240 | -2.56310720919087 |
| H  | -6.11050321167826 | 5.25742026966164 | -3.27819084408547 |
| H  | -4.47167792381990 | 8.29791563502997 | -2.51350689808373 |
| H  | -5.82913494253223 | 7.59777086005282 | -3.31446260523345 |

38

1+\_TS

|    |                   |                   |                   |
|----|-------------------|-------------------|-------------------|
| Au | -0.17484407486309 | 0.30597443884344  | -0.04730177079746 |
| C  | -0.02063006558241 | 0.14643808347455  | 1.99563282566442  |
| N  | 0.20787669232654  | -1.09196712421599 | 2.65057366785384  |
| C  | -0.86097106647227 | -2.09679112718477 | 2.44694011800673  |
| C  | -0.23311049776629 | -3.38649699889825 | 2.99623858029186  |
| C  | 1.29629691665368  | -3.18346326961607 | 2.84163159664847  |
| C  | 1.45298336442257  | -1.78265440781595 | 2.23011149370276  |
| N  | -0.08445156504811 | 1.12875837202504  | 2.84226685588983  |
| C  | -0.30603663518622 | 2.60582129014366  | 2.64558684248526  |
| C  | 0.82998032655790  | 3.18737769763630  | 1.79618708775052  |
| C  | -0.27866708686088 | 3.20897432276971  | 4.05515274701826  |



|    |                   |                   |                   |
|----|-------------------|-------------------|-------------------|
| C  | -1.67486919446715 | 2.84145408966879  | 1.99572618638277  |
| H  | -0.49840812926478 | -3.51940084190064 | 4.04432571734534  |
| H  | -0.59817568373304 | -4.25729938560557 | 2.45245814813512  |
| H  | 1.75574241347105  | -3.93649755032113 | 2.20193054768405  |
| H  | 1.78956995141255  | -3.23213199875155 | 3.81136309967812  |
| H  | 1.51542066114937  | -1.83526026024555 | 1.13348801728830  |
| H  | 2.32637818267530  | -1.24392744800870 | 2.59728641456000  |
| H  | -1.76958230784342 | -1.79763903651559 | 2.96928258353971  |
| H  | -1.09385877087804 | -2.20220851516830 | 1.37574357851038  |
| H  | 0.68531246254967  | 3.04311968513935  | 4.54312529832626  |
| H  | -1.06882245505789 | 2.78995778311432  | 4.68287201879279  |
| H  | -0.43789570297348 | 4.28533606460102  | 3.99653183128252  |
| H  | 1.80325256556981  | 2.98283901833262  | 2.24605993025848  |
| H  | 0.70870119897917  | 4.26907932282856  | 1.72328924136771  |
| H  | 0.82114443427524  | 2.77877942314952  | 0.78513806586322  |
| H  | -1.71807988363034 | 2.41999826974012  | 0.99136752250997  |
| H  | -1.85625792394290 | 3.91439482240148  | 1.92022680957913  |
| H  | -2.47485466476353 | 2.40252181849785  | 2.59474955163889  |
| H  | 0.04571348348513  | 0.83462957467036  | 3.81092964789736  |
| Se | -0.18032453064449 | 0.50337189199815  | -2.52990369888801 |
| C  | -1.74639887640667 | -0.40245557029401 | -3.05920094948256 |
| N  | -2.01048984442673 | -0.47965605790200 | -4.36291922054860 |
| N  | -2.59267970454098 | -0.95696660824079 | -2.19529476783667 |
| H  | -2.39589628268233 | -0.89739362320117 | -1.20843768097142 |
| H  | -3.43502941037381 | -1.43171054660661 | -2.48705074125848 |
| H  | -1.37937993707152 | -0.06579231305048 | -5.03007588903977 |
| H  | -2.83170835904759 | -0.94035328549168 | -4.72660130712912 |

43

1A1

|   |                   |                   |                   |
|---|-------------------|-------------------|-------------------|
| C | -2.86594257711263 | -0.33675525567912 | -3.71194836251608 |
| C | -2.24737889590860 | -0.08729677982312 | -5.09246767419597 |
| C | -0.74206241723724 | -0.22173656897643 | -4.84333840085694 |
| N | -0.57210575137031 | 0.15021381377848  | -3.41755679488655 |
| C | -1.88585072501231 | 0.35399889053332  | -2.76557169514106 |
| C | 0.60036229175509  | 0.26208949135583  | -2.79932182887870 |
| N | 1.69360779639741  | 0.01629467372887  | -3.52413836339649 |
| C | 3.13212971880900  | 0.03801957979969  | -3.11643188017811 |
| C | 3.54490091749124  | 1.44458541879098  | -2.66381538271231 |
| C | 3.91503167461449  | -0.34101888711321 | -4.38043855346879 |
| C | 3.39914079394861  | -1.00122563049665 | -2.02005427445406 |
| H | -2.90051511011209 | -1.40739821493773 | -3.49709140197465 |
| H | -3.87480825167545 | 0.06361694242112  | -3.61764549973242 |
| H | -2.48029736621216 | 0.92430498978090  | -5.43206938694043 |
| H | -2.59429549941659 | -0.78701609362374 | -5.85174909265599 |
| H | -0.15497150599636 | 0.43929110244114  | -5.48461568342705 |
| H | -0.39844745374325 | -1.24969071588734 | -4.99389986115079 |
| H | -1.87641185100653 | -0.07192537436964 | -1.76426939838896 |
| H | -2.09804906892132 | 1.42482248042071  | -2.69470388824598 |
| H | 3.73850056697717  | 0.37953566225795  | -5.18324553538292 |
| H | 3.63234649660100  | -1.33615187049175 | -4.73275108424924 |
| H | 4.98338953503406  | -0.35054063976717 | -4.16365740939990 |
| H | 3.34784292023185  | 2.17621330573647  | -3.45007818438071 |
| H | 4.61246853579755  | 1.45755746469446  | -2.43641555297205 |

|    |                   |                   |                   |
|----|-------------------|-------------------|-------------------|
| H  | 3.00515180792346  | 1.75063367655637  | -1.76595309986019 |
| H  | 2.84632706236261  | -0.77398252663679 | -1.10647604439677 |
| H  | 4.46268507638383  | -1.01218094150412 | -1.77445544287122 |
| H  | 3.11099011983505  | -1.99940659951535 | -2.35586735067294 |
| H  | 1.56245458173205  | -0.25153239318715 | -4.49092850146217 |
| Au | 0.65264912872376  | 0.79559413713131  | -0.80432387209678 |
| Se | 0.77185919407539  | 1.35946530281476  | 1.60563913977525  |
| C  | -0.78655393850912 | 2.42160115574908  | 1.89801178160736  |
| N  | -1.10954259778274 | 2.70680583133929  | 3.14907808929718  |
| N  | -1.52222680214711 | 2.88240121302325  | 0.90099579152594  |
| H  | -1.25372084994857 | 2.69117792341374  | -0.05165352404483 |
| H  | -2.34443113559644 | 3.44997975130111  | 1.05927990002280  |
| H  | -0.56578267592047 | 2.34493361450527  | 3.91642230406611  |
| H  | -1.90574723145115 | 3.28622606709710  | 3.37780907690556  |
| C  | -1.41773820701071 | -3.42742164287054 | 3.99481419189936  |
| F  | -0.44886090535518 | -4.22957310260522 | 4.45151027740074  |
| F  | -2.19055984093340 | -3.07696305782982 | 5.03109385187755  |
| F  | -2.16845443587528 | -4.12935646629554 | 3.13619804254848  |
| I  | -0.57192312443866 | -1.65276972706078 | 3.02256057806471  |

43

1A1TS

|   |                   |                   |                  |
|---|-------------------|-------------------|------------------|
| C | 0.03760858127539  | 0.29494913771528  | 2.06914889310491 |
| N | -0.29351897972494 | -0.94008561547753 | 2.69128204862777 |
| C | -1.64493631589896 | -1.44386528892806 | 2.35154229889487 |
| C | -1.62281272392297 | -2.88370538816929 | 2.88518690003097 |
| C | -0.12565284040864 | -3.28932215616539 | 2.87890856017946 |
| C | 0.61643023796021  | -2.05729910872832 | 2.33969019432591 |

|    |                   |                   |                   |
|----|-------------------|-------------------|-------------------|
| N  | 0.26155163397023  | 1.23014050076917  | 2.93858504926094  |
| C  | 0.63285928503253  | 2.67655909636335  | 2.76036216793116  |
| C  | 1.96674117485362  | 2.78357127008958  | 2.01144551403617  |
| C  | 0.78092689033126  | 3.23414317509134  | 4.18076475823572  |
| C  | -0.49300950816054 | 3.40895321582041  | 2.02070403478016  |
| H  | -2.02546325710131 | -2.91835625318584 | 3.89736534212847  |
| H  | -2.23600207970695 | -3.53516729145531 | 2.26256220666713  |
| H  | 0.06901891336794  | -4.16050638153911 | 2.25352524792047  |
| H  | 0.21134262590708  | -3.52356199381303 | 3.88821459587368  |
| H  | 0.74573233075979  | -2.12381817687538 | 1.24948367587900  |
| H  | 1.59593780776728  | -1.90450364745784 | 2.79170346061249  |
| H  | -2.41067292553641 | -0.81851385579807 | 2.80987762804930  |
| H  | -1.79937892736169 | -1.43379513213254 | 1.26171465165713  |
| H  | 1.56885576849305  | 2.71183595519231  | 4.72755605723223  |
| H  | -0.15477969277600 | 3.14370926336536  | 4.73699271441797  |
| H  | 1.04479706635458  | 4.29035181531719  | 4.13085725939454  |
| H  | 2.74964005621914  | 2.22903807979427  | 2.53161739405625  |
| H  | 2.26243567976292  | 3.83245212539114  | 1.95920990210656  |
| H  | 1.89013122215310  | 2.40209789971630  | 0.99234724856727  |
| H  | -0.62705756510376 | 3.02025368172916  | 1.01023280529612  |
| H  | -0.24316251760309 | 4.46827927210297  | 1.94711888690648  |
| H  | -1.43821160407839 | 3.31321063694759  | 2.55830863829815  |
| H  | 0.16185802469353  | 0.92754438337696  | 3.90753034826266  |
| Au | 0.14993024338194  | 0.50211981214369  | 0.04166195968915  |
| Se | 0.38443941692332  | 0.81789666634680  | -2.41168980393915 |
| C  | -0.44728188021418 | -0.73108619395523 | -3.15890304719527 |
| N  | -0.21075058622798 | -0.99231788936870 | -4.43227439122305 |
| N  | -1.24382471460473 | -1.51674560279260 | -2.45461806473164 |
| H  | -1.46193629840598 | -1.28845680609796 | -1.49763118729331 |

|   |                   |                   |                   |
|---|-------------------|-------------------|-------------------|
| H | -1.68024294785986 | -2.33541763659514 | -2.85714217985470 |
| H | 0.42292695498139  | -0.41623661289819 | -4.96292521878866 |
| H | -0.65346918672835 | -1.76509008540346 | -4.91124820520961 |
| C | -3.82262622860824 | 4.73275292725942  | -3.20242881174457 |
| F | -3.28989115084112 | 5.94422937896736  | -3.40560032326718 |
| F | -4.58458899649370 | 4.43187945162100  | -4.26135999425490 |
| F | -4.61860190911424 | 4.80466236509089  | -2.12754346516914 |
| I | -2.25298107770623 | 3.22463100662545  | -2.91191574975188 |

46

1A2

|   |                   |                   |                   |
|---|-------------------|-------------------|-------------------|
| C | -3.19456361234137 | -0.02195962291370 | -3.25735383853120 |
| C | -2.36368500413623 | 0.47179184110587  | -4.44777470913014 |
| C | -0.94503355930748 | -0.00631119818507 | -4.12302021442437 |
| N | -0.91320908512580 | -0.08158258411108 | -2.64222165534516 |
| C | -2.25352982883290 | 0.18353429033960  | -2.07159294960358 |
| C | 0.16687665727609  | -0.37077882263020 | -1.92274789323232 |
| N | 1.29644113963051  | -0.60942481581723 | -2.59253674059192 |
| C | 2.65337403297571  | -0.96942258406886 | -2.07645092171438 |
| C | 3.21601924719411  | 0.15971309085158  | -1.20340275425613 |
| C | 3.52932953552265  | -1.13563478299930 | -3.32501482593443 |
| C | 2.60505794639282  | -2.29548932070988 | -1.30601420128810 |
| H | -3.42830982049037 | -1.08294102019338 | -3.36953911947654 |
| H | -4.12981790660022 | 0.52311253743786  | -3.13477346861425 |
| H | -2.38671233526157 | 1.56262231866897  | -4.49721010480586 |
| H | -2.71056746273960 | 0.08287524360404  | -5.40409695323864 |

|    |                   |                   |                   |
|----|-------------------|-------------------|-------------------|
| H  | -0.18065337715487 | 0.68289714441396  | -4.48892513937879 |
| H  | -0.74647882703674 | -0.99839667108321 | -4.54054722007666 |
| H  | -2.44670043427536 | -0.49235353638676 | -1.24085578908575 |
| H  | -2.29940877821918 | 1.21409675133899  | -1.70799710199703 |
| H  | 3.57868344405258  | -0.20554383028629 | -3.89674074752351 |
| H  | 3.14520260529956  | -1.92788601228803 | -3.97280778441811 |
| H  | 4.54412429031678  | -1.40335987629900 | -3.03045393842748 |
| H  | 3.25005198984355  | 1.09841200462847  | -1.75995256101657 |
| H  | 4.22949186822698  | -0.09187299637009 | -0.88625849071456 |
| H  | 2.61004614382289  | 0.31029000314751  | -0.30850966477523 |
| H  | 1.98721635374328  | -2.21743183483219 | -0.40915198387336 |
| H  | 3.61291067876098  | -2.57527366991250 | -0.99472589261372 |
| H  | 2.20181162272138  | -3.09303133173414 | -1.93304150496815 |
| H  | 1.25891272162207  | -0.56226617071113 | -3.60282760527830 |
| Au | 0.03240565813353  | -0.43124415387711 | 0.13763018630824  |
| Se | -0.11552771490366 | -0.62146867758499 | 2.60442027915462  |
| C  | -1.30482935188610 | 0.78638309481592  | 3.10107993533624  |
| N  | -1.70103746117182 | 0.83569249388449  | 4.36270794730668  |
| N  | -1.72421115395320 | 1.69373200173666  | 2.23620987581439  |
| H  | -1.38206156532563 | 1.68020518154915  | 1.28804418066702  |
| H  | -2.35013686013680 | 2.44142487347543  | 2.50543579565133  |
| H  | -1.41182726819443 | 0.12910674489118  | 5.02073478262824  |
| H  | -2.29760334029931 | 1.57536367981348  | 4.70796429267241  |
| C  | 4.64624284453562  | 1.84309943693802  | 4.69613851056161  |
| C  | 5.69755146812952  | 2.26182467224011  | 3.62816974290808  |
| I  | 2.85054449587595  | 0.92388767728173  | 3.81808826652368  |
| F  | 4.30294073219095  | 2.94389111031530  | 5.39522796030962  |
| F  | 5.23596457106264  | 0.97635174343518  | 5.54346724040430  |
| F  | 5.17976956710173  | 3.16311352682287  | 2.78549712746895  |

|   |                  |                  |                  |
|---|------------------|------------------|------------------|
| F | 6.10728509706003 | 1.19863573492399 | 2.92787565774647 |
| F | 6.76264003590075 | 2.80920631533378 | 4.23054399287237 |

46

1A2TS

|   |                   |                   |                  |
|---|-------------------|-------------------|------------------|
| C | -0.01766622656876 | 0.04332799381019  | 2.06853775871462 |
| N | 0.16211802528375  | -1.17656720841469 | 2.77651359033003 |
| C | -0.85173455062011 | -2.21382095489796 | 2.46183653977813 |
| C | -0.25859982024876 | -3.48223822239987 | 3.09472563980894 |
| C | 1.27094889280005  | -3.22938854022255 | 3.14389344915940 |
| C | 1.46342590977914  | -1.84211737329145 | 2.51474286555661 |
| N | -0.17360840282846 | 1.04865468648335  | 2.87324278972292 |
| C | -0.39900237862444 | 2.50707995241215  | 2.59489164939559 |
| C | 0.78350589368229  | 3.07437963799247  | 1.80150266500386 |
| C | -0.47928393488803 | 3.17876538585014  | 3.97057941383430 |
| C | -1.72497334717735 | 2.68261779385738  | 1.84531788664086 |
| H | -0.65566101764710 | -3.62907204013194 | 4.09886730143358 |
| H | -0.51753153225524 | -4.36128517958189 | 2.50463177942123 |
| H | 1.83756647563194  | -3.98218373275787 | 2.59622768313614 |
| H | 1.62627786301806  | -3.23002882061170 | 4.17412469481764 |
| H | 1.64662597464286  | -1.92585192033631 | 1.43394159238599 |
| H | 2.27719471244628  | -1.26982483328919 | 2.95948734160521 |
| H | -1.82023910393729 | -1.93257002626192 | 2.87397338155045 |
| H | -0.95903178718496 | -2.33422820131067 | 1.37410955569259 |
| H | 0.45224907620601  | 3.04680390820290  | 4.52567826691614 |
| H | -1.30289250468243 | 2.76901850104446  | 4.55981422840428 |
| H | -0.65132831616979 | 4.24785863472220  | 3.84560883700959 |
| H | 1.72059542015287  | 2.92487444822948  | 2.34106133170615 |

|    |                   |                   |                   |
|----|-------------------|-------------------|-------------------|
| H  | 0.63679137176495  | 4.14529125251906  | 1.65404478979809  |
| H  | 0.87358568525993  | 2.60247493762164  | 0.82206038768388  |
| H  | -1.70788834486785 | 2.17089736667740  | 0.88178797293694  |
| H  | -1.90536783710047 | 3.74451030024304  | 1.67234552200706  |
| H  | -2.55649608349105 | 2.28034379761342  | 2.42652386362301  |
| H  | -0.14572066532823 | 0.79666972888004  | 3.86131269201591  |
| Au | 0.00823409367649  | 0.09010686429143  | 0.01961078408704  |
| Se | 0.16066915959267  | -0.16105000988762 | -2.44628559668020 |
| C  | -0.09412083199771 | 1.59364172372695  | -3.15562244771619 |
| N  | 0.17976978126910  | 1.77757733090399  | -4.43610705952509 |
| N  | -0.53671650401212 | 2.59833885908446  | -2.41956532825377 |
| H  | -0.80119982953502 | 2.44289092836119  | -1.46078371222973 |
| H  | -0.68330386441394 | 3.52190030125769  | -2.80527066386659 |
| H  | 0.54857572815812  | 1.02503470456268  | -4.99640024296071 |
| H  | 0.03016528418731  | 2.66708634496653  | -4.89313826322467 |
| C  | -5.03664894313761 | -2.12196255172380 | -4.00068472893701 |
| C  | -6.05575653893566 | -2.27370101424342 | -2.83428352067309 |
| I  | -3.07682804877930 | -1.37979888973426 | -3.33397879937071 |
| F  | -5.56348641747654 | -1.27195129575731 | -4.90534510869807 |
| F  | -4.89545464591393 | -3.32580064348800 | -4.58964893491454 |
| F  | -6.27271399176410 | -1.09373634453260 | -2.24223171444690 |
| F  | -5.60281456778443 | -3.14057769888384 | -1.92233705022734 |
| F  | -7.22337931018112 | -2.72977988155538 | -3.30930308245153 |



1A3

|   |                   |                   |                   |
|---|-------------------|-------------------|-------------------|
| C | -3.44189945675108 | -0.56720154833347 | -3.28344096186978 |
| C | -2.92883189101046 | 0.33516410898329  | -4.41095282606674 |
| C | -1.40942341363535 | 0.32710171151951  | -4.21747665403048 |
| N | -1.22538355361127 | 0.07291549581185  | -2.76628817855387 |
| C | -2.52636656361865 | -0.21236332104336 | -2.11440415389630 |
| C | -0.05857690135497 | 0.13627950670844  | -2.13472412247297 |
| N | 1.01962775427496  | 0.42219469203545  | -2.86728442738345 |
| C | 2.43531988684526  | 0.65726877050925  | -2.44388076071574 |
| C | 2.51889536808021  | 1.86559698482024  | -1.50157208556871 |
| C | 3.19470396601994  | 0.96757389830022  | -3.74091221021389 |
| C | 3.03137844786732  | -0.59782624784585 | -1.79628244794461 |
| H | -3.31760584966475 | -1.61962473538514 | -3.55060316038482 |
| H | -4.49082879402372 | -0.39706942871241 | -3.04303231386756 |
| H | -3.31301788069594 | 1.35008836222847  | -4.28666348462686 |
| H | -3.21077103920163 | -0.01447057826301 | -5.40315096599065 |
| H | -0.95176459860608 | 1.27826858732958  | -4.49884987677097 |
| H | -0.93126866053555 | -0.47423775387609 | -4.78908391178624 |
| H | -2.42048940072747 | -1.01584944078084 | -1.38885341680564 |
| H | -2.87682584157662 | 0.68386737885689  | -1.59568925029431 |
| H | 2.77992140632440  | 1.84930425862872  | -4.23567635675815 |
| H | 3.15230753140261  | 0.12252338789548  | -4.43263656789795 |
| H | 4.24225388784448  | 1.16928962841182  | -3.51673117171273 |
| H | 2.10797394858563  | 2.75705192758672  | -1.97928128560850 |
| H | 3.56149634267637  | 2.06117060361134  | -1.24461488883793 |
| H | 1.97142445848231  | 1.69067639494308  | -0.57356683394606 |
| H | 2.53428590757636  | -0.84323500168876 | -0.85674045186285 |
| H | 4.08808883190436  | -0.43055597437182 | -1.58079095127954 |
| H | 2.94477585741800  | -1.45626558851065 | -2.46490167229190 |

|    |                   |                   |                   |
|----|-------------------|-------------------|-------------------|
| H  | 0.87898173663839  | 0.56574815083391  | -3.85888796465631 |
| Au | -0.00156512327361 | -0.14559019705901 | -0.08658138259419 |
| Se | -0.12862178237409 | -0.17886268966153 | 2.39195124373484  |
| C  | 1.53626925415536  | -0.95760624411318 | 2.95593086565663  |
| N  | 1.95055506451043  | -2.13346077316748 | 2.52742726156607  |
| N  | 2.23423416246902  | -0.29540020140813 | 3.86316213261437  |
| H  | 1.95178719731799  | 0.63035866292914  | 4.14308291686749  |
| H  | 3.05711927881389  | -0.68968989605037 | 4.30000897919759  |
| H  | 1.38469447472952  | -2.71189539143127 | 1.92017035348623  |
| H  | 2.82261536500862  | -2.53425361623522 | 2.84831962488019  |
| C  | 1.01435684066798  | -7.34859067506951 | 0.62089305298741  |
| C  | 0.17113250031785  | -7.65654638354948 | -0.62376922097039 |
| C  | -0.29665324732753 | -6.30521674835642 | -1.13799341530543 |
| H  | -0.70493303610097 | -8.27077535182264 | -0.41361001152779 |
| H  | 0.73815660416444  | -8.14755786117712 | -1.41601589389769 |
| C  | 1.01074723720104  | -5.83606418072060 | 0.73924738311547  |
| H  | 2.04638798726795  | -7.69134612558126 | 0.54229638853026  |
| H  | 0.59552272681924  | -7.76662193744518 | 1.53711010371842  |
| N  | 0.23785890402840  | -5.33188593459128 | -0.29606914825824 |
| O  | 1.56991050115085  | -5.15694192174647 | 1.57755607255513  |
| O  | -0.99891391097911 | -6.08022342732125 | -2.09691544770243 |
| I  | -0.06705248549436 | -3.25438333662463 | -0.50267850455842 |

50

1A3TS

|   |                   |                   |                  |
|---|-------------------|-------------------|------------------|
| C | -0.45221604942503 | -0.29733730429972 | 1.99946470183033 |
| N | -1.63333360990493 | -0.86594384129173 | 2.55140786133811 |
| C | -2.85369625690620 | -0.04347394890879 | 2.37054594758957 |

|    |                   |                   |                   |
|----|-------------------|-------------------|-------------------|
| C  | -3.98401397351205 | -1.00340835334491 | 2.77566665478197  |
| C  | -3.40369180862043 | -2.42303650958428 | 2.54354145548659  |
| C  | -1.99874630755576 | -2.18399054089758 | 1.97332991903032  |
| N  | 0.45515282906377  | -0.09955269550783 | 2.90460250623382  |
| C  | 1.86682147280208  | 0.41124936623210  | 2.80904709277759  |
| C  | 2.70523978590603  | -0.57727869538582 | 1.98945337148936  |
| C  | 2.37367343010059  | 0.46449052092256  | 4.25510460186009  |
| C  | 1.88503227343150  | 1.81421891398308  | 2.19464956453502  |
| H  | -4.24936726232443 | -0.86267515832657 | 3.82316115480741  |
| H  | -4.87609290316759 | -0.81505491875582 | 2.17904773951827  |
| H  | -4.00531341274043 | -3.01710873744518 | 1.85521226564725  |
| H  | -3.34003844334527 | -2.96846690254439 | 3.48524876291548  |
| H  | -2.02821205443373 | -2.12919836162424 | 0.87540405634564  |
| H  | -1.27203988879495 | -2.94276434259771 | 2.26338816788115  |
| H  | -2.80041572073592 | 0.85790440919451  | 2.97958004531520  |
| H  | -2.96497220260324 | 0.25129679008683  | 1.31704685646433  |
| H  | 2.34442437671500  | -0.52409115743254 | 4.71946123242523  |
| H  | 1.77552723126465  | 1.15351243506157  | 4.85485232507784  |
| H  | 3.40636223556791  | 0.81228020068814  | 4.26535278403152  |
| H  | 2.67607786865832  | -1.57408100498852 | 2.43320243159085  |
| H  | 3.74208067583452  | -0.23837393043483 | 1.97078478517675  |
| H  | 2.34859059662165  | -0.64445648482517 | 0.96057864860677  |
| H  | 1.53741623881638  | 1.80452849910663  | 1.16172524704396  |
| H  | 2.90821587429118  | 2.19291132088901  | 2.20496202086266  |
| H  | 1.25648039308391  | 2.49846831819461  | 2.76653358288608  |
| H  | 0.16488715234195  | -0.37853230296720 | 3.84184071301560  |
| Au | -0.23614088506589 | 0.02887214926128  | -0.01419323960446 |
| Se | 0.05358788852072  | 0.07010882329084  | -2.48463766980891 |
| C  | 1.56234452344119  | 1.24616858649701  | -2.71551978086718 |

|   |                   |                   |                   |
|---|-------------------|-------------------|-------------------|
| N | 1.50146795431813  | 2.52972703395197  | -2.42272774362967 |
| N | 2.65665871421839  | 0.73442475702091  | -3.25180949916127 |
| H | 2.71171085736035  | -0.25369709072005 | -3.44149796659273 |
| H | 3.45313007163026  | 1.30667221045269  | -3.50087638263164 |
| H | 0.64589214445219  | 2.97489067321606  | -2.11198818420379 |
| H | 2.28711040843817  | 3.14554176852171  | -2.59170822378137 |
| C | -1.38857510644283 | 7.11116444368789  | -1.57397770215864 |
| C | -2.49139368287634 | 7.29882301960805  | -0.52373178593880 |
| C | -2.71772519273336 | 5.92150116187950  | 0.07506962099559  |
| H | -3.43183355580124 | 7.66296124699107  | -0.93715014081115 |
| H | -2.20035772816705 | 7.97398091778941  | 0.28243485725307  |
| C | -0.97229294346538 | 5.65840465975655  | -1.45790682227407 |
| H | -0.51618190651818 | 7.74499135018399  | -1.41309927798640 |
| H | -1.73868850298302 | 7.28282505131985  | -2.59319165922229 |
| N | -1.79099775102068 | 5.05815842042108  | -0.51377293464282 |
| O | -0.09063389184841 | 5.08661449183769  | -2.06902868146963 |
| O | -3.52379799619172 | 5.59872448232450  | 0.91519174924272  |
| I | -1.57611595969476 | 3.02710625951184  | -0.04707502927130 |

5

A1

|   |                   |                   |                  |
|---|-------------------|-------------------|------------------|
| C | -1.17999963809415 | -3.13264705701285 | 1.34122210040500 |
| F | -0.35509176300000 | -4.18370212052023 | 1.36935783914215 |
| F | -1.52209115059930 | -2.83433355861292 | 2.59821333346661 |
| F | -2.28581333752348 | -3.48562798371543 | 0.67845788966677 |
| I | -0.22172411078307 | -1.42735928013857 | 0.37943883731948 |

8

A2

|   |                  |                   |                  |
|---|------------------|-------------------|------------------|
| C | 5.58286908707159 | 0.05969435877283  | 2.74475293343128 |
| C | 6.37854300613514 | 0.82557557220609  | 1.64507810027923 |
| I | 3.43098231409612 | 0.05118147028205  | 2.37589055811576 |
| F | 5.84074418104458 | 0.64453664734399  | 3.92912299509035 |
| F | 6.04442839677838 | -1.20318665905530 | 2.79048956389622 |
| F | 5.99599546584372 | 2.10435930516140  | 1.59033695423526 |
| F | 6.19184429249963 | 0.26132621808391  | 0.44826944018823 |
| F | 7.68692325653084 | 0.78524308720504  | 1.93396945476366 |

12

A3

|   |                   |                   |                   |
|---|-------------------|-------------------|-------------------|
| C | 0.98748915048958  | -7.03894255805765 | 0.29963094248694  |
| C | -0.04719747210382 | -7.28738545640659 | -0.80452763012722 |
| C | -0.53901538595405 | -5.91291129146767 | -1.21778292779878 |
| H | -0.90491620648442 | -7.87093999390260 | -0.46777504365204 |
| H | 0.36719207595456  | -7.78358570289632 | -1.68276943648768 |
| C | 1.03365009536270  | -5.53387197263789 | 0.48312937991180  |
| H | 1.98854220305044  | -7.38275837908400 | 0.03695142213751  |
| H | 0.72032751648439  | -7.49498950316449 | 1.25338960432427  |
| N | 0.13098758820774  | -4.97702974947257 | -0.42611731783281 |
| O | 1.71186008295678  | -4.90380418590811 | 1.25965577039869  |
| O | -1.35652327530184 | -5.64375003581310 | -2.06585778251815 |

I -0.18270637266205 -2.94163117118901 -0.58896698084253

8

SeU

|    |                   |                  |                  |
|----|-------------------|------------------|------------------|
| Se | 0.29132366926730  | 0.24128276302062 | 2.02237246455948 |
| C  | 0.10331258911759  | 2.05846318964385 | 2.42256853270624 |
| N  | 1.13994145728390  | 2.78235231423585 | 2.85542483794854 |
| N  | -1.07156217983621 | 2.67989837612849 | 2.28281653597660 |
| H  | -1.86824092848761 | 2.15917978499174 | 1.95749683956973 |
| H  | -1.19844383229798 | 3.65738044686920 | 2.50302571769675 |
| H  | 2.03146364367554  | 2.33557766144497 | 2.98752706568377 |
| H  | 1.05708558127747  | 3.76031546366527 | 3.09322800585888 |

74

2+

|    |                  |                  |                  |
|----|------------------|------------------|------------------|
| Au | 0.66684892497884 | 7.83724788237557 | 5.50105034364353 |
| Se | 2.09800632256441 | 6.29862480698398 | 4.21088027991519 |
| N  | 2.35809676933045 | 6.13980189154544 | 1.45106445561944 |
| H  | 3.00483944599426 | 5.39969933343794 | 1.67369967137886 |
| H  | 2.21112735977596 | 6.35146605694226 | 0.47377785154583 |
| N  | 0.88135053497886 | 7.76683825177220 | 2.09837270933497 |
| H  | 0.69483420735086 | 8.02165254484104 | 1.13789070942683 |
| H  | 0.40380864920539 | 8.27363340786428 | 2.82708511317839 |

|   |                   |                   |                  |
|---|-------------------|-------------------|------------------|
| N | -0.63450713675679 | 9.19140303543642  | 7.92555206993544 |
| N | -1.34145455632551 | 10.04677903432292 | 6.07942435683779 |
| C | 1.72971184732063  | 6.79917994775725  | 2.41349224996265 |
| C | -0.50708869302715 | 9.10207992926193  | 6.57954045313168 |
| C | -1.98674093895617 | 10.72175503969393 | 7.10578379545115 |
| H | -2.69141672029297 | 11.51155799459404 | 6.91503631233742 |
| C | -1.54299309396198 | 10.18446347790693 | 8.26432184819717 |
| H | -1.78454717806348 | 10.41198632566462 | 9.28732128360974 |
| C | -1.52424685090973 | 10.32269025231949 | 4.67087881980118 |
| C | -0.68611901229344 | 11.27091914042381 | 4.05842406729032 |
| C | -0.88102015057305 | 11.51288743750980 | 2.69682451672635 |
| H | -0.25522854299115 | 12.23684515720516 | 2.18985031475659 |
| C | -1.87001634562550 | 10.84848449807808 | 1.98386294632332 |
| H | -2.00680111119173 | 11.05624228240119 | 0.92918776755294 |
| C | -2.69163337497941 | 9.92750181730708  | 2.61969468901316 |
| H | -3.46689646808080 | 9.42662042183358  | 2.05340712373722 |
| C | -2.54268824680353 | 9.64446919287508  | 3.97930779030059 |
| C | 0.38982715731707  | 12.03903852024549 | 4.81466988041803 |
| H | 0.40398546311217  | 11.68160071526902 | 5.84404343496734 |
| C | 1.78978730671082  | 11.79056777017282 | 4.23006365479071 |
| H | 1.86509279003855  | 12.15261197082716 | 3.20220694497360 |
| H | 2.03932912298501  | 10.72739375786917 | 4.23413342298160 |
| H | 2.54122631536763  | 12.31648393149034 | 4.82299575720090 |
| C | 0.07008666188247  | 13.54328306004975 | 4.85951065267818 |
| H | -0.91446561832926 | 13.72946729624214 | 5.29431786272492 |
| H | 0.08398432647521  | 13.98319105622022 | 3.85943760772969 |
| H | 0.81297867746210  | 14.06656270007148 | 5.46568429529586 |
| C | -3.47534767744277 | 8.64311106892996  | 4.64759888169614 |
| H | -3.18147451108203 | 8.54721732408229  | 5.69289453583037 |

|   |                   |                   |                   |
|---|-------------------|-------------------|-------------------|
| C | -4.93160630668115 | 9.13980982798008  | 4.62941279404482  |
| H | -5.31029913885667 | 9.22522591191813  | 3.60817198051362  |
| H | -5.02285716592120 | 10.11835261355797 | 5.10565827000434  |
| H | -5.57357993855589 | 8.43901994167212  | 5.16769920189583  |
| C | -3.36027665560213 | 7.24597702614287  | 4.01485533450027  |
| H | -3.99620672984568 | 6.53858776173285  | 4.55163700443133  |
| H | -2.33341116628821 | 6.87528522913325  | 4.05467329394104  |
| H | -3.67799887358954 | 7.25368762184093  | 2.96995842669844  |
| C | 0.07543857491972  | 8.37365842354452  | 8.88685136676271  |
| C | 1.30750497571081  | 8.83585278002316  | 9.37886648558475  |
| C | 1.96589874979842  | 8.03299628185035  | 10.31232063385872 |
| H | 2.91891687524403  | 8.35437260210500  | 10.71244255545971 |
| C | 1.41796750905011  | 6.83089463047408  | 10.73760782971576 |
| H | 1.94621616118625  | 6.22349929532771  | 11.46298816222343 |
| C | 0.19394912609261  | 6.40562111544460  | 10.24050529260231 |
| H | -0.22243535194528 | 5.46760720104104  | 10.58496116382729 |
| C | -0.51017519971003 | 7.16751244525383  | 9.30578824893188  |
| C | 1.93583587011209  | 10.15254592496651 | 8.94137717065028  |
| H | 1.27088668158316  | 10.62330044188311 | 8.21647773883899  |
| C | 3.28543137286622  | 9.92967244518993  | 8.23786156583261  |
| H | 3.17818158286839  | 9.26174959250384  | 7.38044308069761  |
| H | 4.02229188386456  | 9.49355776750586  | 8.91606909557214  |
| H | 3.68379712723782  | 10.88190024590286 | 7.87993326458204  |
| C | 2.07952843255647  | 11.12830777885230 | 10.12182572192024 |
| H | 2.76838183494973  | 10.74263497502207 | 10.87692980332577 |
| H | 1.11735753129059  | 11.31151426113978 | 10.60539813114708 |
| H | 2.46997158793267  | 12.08624816440986 | 9.77122975133712  |
| C | -1.85525220433800 | 6.67286423377256  | 8.79066198451437  |
| H | -2.24487171887229 | 7.41162940371091  | 8.08950202803989  |



|   |                   |                  |                   |
|---|-------------------|------------------|-------------------|
| C | -1.71218496739661 | 5.34906380092963 | 8.02095165566868  |
| H | -1.35137362683815 | 4.54795986005126 | 8.66999032005901  |
| H | -1.01310785948497 | 5.45032636326320 | 7.18803735386108  |
| H | -2.68006983405155 | 5.04200898894621 | 7.61775870854327  |
| C | -2.88232491071664 | 6.54498819498847 | 9.92850950039517  |
| H | -3.85431220262695 | 6.25260521250551 | 9.52472134760601  |
| H | -3.00694567714783 | 7.49112985235896 | 10.46021704911825 |
| H | -2.58043500395917 | 5.78695945123088 | 10.65450521299890 |

86

2A3

|    |                   |                   |                   |
|----|-------------------|-------------------|-------------------|
| Au | -0.64192632476325 | 2.15258755385499  | -0.69733641224844 |
| Se | -0.07469114950588 | -0.25421789137920 | -0.67746065004260 |
| N  | -1.81428732857565 | -2.41597797502323 | -0.41686162615483 |
| H  | -0.96024876776195 | -2.94811308534189 | -0.50389669163323 |
| H  | -2.67445025175139 | -2.93524213759988 | -0.28123347910105 |
| N  | -2.91305045322323 | -0.40141122417743 | -0.31047277481473 |
| H  | -3.80941045732410 | -0.85411341365335 | -0.16777864218651 |
| H  | -2.89029407873369 | 0.60977261145280  | -0.32317061639547 |
| N  | -0.33694315150878 | 5.26670967442735  | -0.56230914414635 |
| N  | -2.39464659322206 | 4.64073194337763  | -0.58733247738143 |
| C  | -1.79522292001212 | -1.09425813915746 | -0.43939028424699 |
| C  | -1.12424489338307 | 4.16064307379229  | -0.58257144348585 |
| C  | -2.40180021441697 | 6.02670121913206  | -0.59101719480905 |
| H  | -3.31516115228232 | 6.59307067966313  | -0.59455524124269 |
| C  | -1.10908905810459 | 6.41992247995074  | -0.57724927761847 |
| H  | -0.66703955865176 | 7.40063554084907  | -0.57178132626847 |

|   |                   |                  |                   |
|---|-------------------|------------------|-------------------|
| C | -3.58466650963141 | 3.82997008731354 | -0.48162966203331 |
| C | -4.15904119361369 | 3.32512089357184 | -1.65071083783642 |
| C | -5.29073728874613 | 2.51399042554595 | -1.50553380220820 |
| H | -5.76719411878429 | 2.10806576789830 | -2.38279958707860 |
| C | -5.81831205841711 | 2.23688014760493 | -0.25106902453903 |
| H | -6.69406613712008 | 1.60765003287491 | -0.15887789895436 |
| C | -5.23985874262459 | 2.77749533375599 | 0.88600009199096  |
| H | -5.67438765250274 | 2.56588173885793 | 1.85515308090057  |
| C | -4.11528000379126 | 3.59892301967409 | 0.80030836404708  |
| C | -3.61905606407844 | 3.68036890467634 | -3.02649295443213 |
| H | -2.69461933249408 | 4.24076953195300 | -2.88917463398653 |
| C | -3.27704039185663 | 2.44668405051967 | -3.86929124944132 |
| H | -4.16792306575084 | 1.86095343694137 | -4.10958069200846 |
| H | -2.57283289429145 | 1.79651633931982 | -3.35270390563226 |
| H | -2.81798206799288 | 2.75928832210778 | -4.80760841782788 |
| C | -4.59518326340326 | 4.60790334340739 | -3.75960080078942 |
| H | -4.85218913983291 | 5.47689603582545 | -3.15243171264163 |
| H | -5.52094560470648 | 4.08517232360845 | -4.00781470817832 |
| H | -4.14615539034568 | 4.96665350599010 | -4.68765443327844 |
| C | -3.52115722711847 | 4.21678314855666 | 2.05932472544562  |
| H | -2.68492238658320 | 4.84826438718797 | 1.76404571685722  |
| C | -4.53314501979036 | 5.13196388240231 | 2.77226214440748  |
| H | -5.37214408846285 | 4.56236674439520 | 3.17402984127468  |
| H | -4.93414896565182 | 5.89592390505328 | 2.10120025627812  |
| H | -4.04319653638844 | 5.63768238271778 | 3.60614418291124  |
| C | -2.96723825306921 | 3.15357498610839 | 3.01696559535684  |
| H | -2.49815552272189 | 3.63643449005078 | 3.87576988590827  |
| H | -2.21635381547448 | 2.53060687257587 | 2.52474229702460  |
| H | -3.75652274991977 | 2.50178582914992 | 3.39379898299379  |

|   |                   |                  |                   |
|---|-------------------|------------------|-------------------|
| C | 1.10366991987691  | 5.30048770117904 | -0.44099941363351 |
| C | 1.87922791792176  | 5.23707033431628 | -1.60630068843562 |
| C | 3.25995731553024  | 5.32342999567759 | -1.45857596981912 |
| H | 3.89135171872929  | 5.27159402288805 | -2.33468604832125 |
| C | 3.83444155356377  | 5.48480513334307 | -0.20946944173345 |
| H | 4.90734260406090  | 5.55729295012072 | -0.11805212550242 |
| C | 3.03927107306533  | 5.56818410574504 | 0.92319828804309  |
| H | 3.50370837800345  | 5.71652294909369 | 1.88706389629538  |
| C | 1.65327118904296  | 5.48844754585762 | 0.83833873631572  |
| C | 1.27709073908842  | 5.10431871126638 | -2.99403775790973 |
| H | 0.19977730354078  | 5.01105692470048 | -2.88957627650709 |
| C | 1.76936393339884  | 3.84067011159796 | -3.71128448843604 |
| H | 1.55813768272991  | 2.95022499687074 | -3.12181497563316 |
| H | 2.84223918614777  | 3.87932409819910 | -3.89401722287679 |
| H | 1.26845985106986  | 3.73617721318790 | -4.67309945794239 |
| C | 1.54231529108529  | 6.36366866332798 | -3.82909869680728 |
| H | 2.60713010572025  | 6.50546783401136 | -4.01083429983878 |
| H | 1.16716710811200  | 7.25592492039009 | -3.32581365732682 |
| H | 1.04221069258525  | 6.28385830971529 | -4.79487277389527 |
| C | 0.80888472236232  | 5.66921467994612 | 2.09278725205276  |
| H | -0.23286735989122 | 5.49824883022766 | 1.82686814198355  |
| C | 1.15832866077595  | 4.66230809170723 | 3.20142525276648  |
| H | 2.19319850336407  | 4.77115597595814 | 3.52934539602047  |
| H | 1.00874071888125  | 3.63234419541039 | 2.86540055055255  |
| H | 0.52036149163659  | 4.82968907361306 | 4.06987903540020  |
| C | 0.91380174011455  | 7.11522541058858 | 2.61869682111987  |
| H | 0.24218425433497  | 7.25474350845534 | 3.46561098207347  |
| H | 0.64705484209813  | 7.84583490747617 | 1.84909801212908  |
| H | 1.92605747753804  | 7.34025102994006 | 2.95823883843622  |

|   |                   |                  |                  |
|---|-------------------|------------------|------------------|
| C | -0.42947426693720 | 0.59982641811889 | 5.41959020657981 |
| H | -0.46670722211136 | 1.89568535693980 | 7.11440603838337 |
| H | -0.09895874191279 | 0.22139289709927 | 7.48615486043664 |
| C | 1.82279456986637  | 1.08022433567606 | 5.07989692250965 |
| H | 2.23149103397061  | 0.63749834971263 | 7.10814516032275 |
| H | 1.87969655180420  | 2.32386719727526 | 6.81986426981963 |
| N | 0.62095368574403  | 0.66909961322291 | 4.51349322092626 |
| O | 2.87648100886197  | 1.20119081925069 | 4.48189448592972 |
| O | -1.57000406827341 | 0.27575663642754 | 5.14599473744004 |
| C | 1.58565873074570  | 1.30771660223156 | 6.56116925025149 |
| C | 0.09502054905403  | 1.02288345116324 | 6.77801407845306 |
| I | 0.38637139308558  | 0.22816531825817 | 2.44551529762340 |

31

3\_

|   |                   |                   |                   |
|---|-------------------|-------------------|-------------------|
| C | -4.12172910511943 | -0.05171938409614 | -3.14548687619003 |
| C | -5.01804780676703 | -0.66450654692927 | -4.22794830193169 |
| C | -4.02360178472966 | -1.30921496888582 | -5.19902180982581 |
| N | -2.78397388952965 | -0.51448325394771 | -5.03699273760560 |
| C | -2.92607453432094 | 0.46978432772756  | -3.94044501133822 |
| C | -1.68392724840325 | -0.66224881845347 | -5.77531271539118 |
| N | -1.72612244229185 | -1.60684316024242 | -6.72177007449732 |
| C | -0.67639994828104 | -2.02661681941840 | -7.69907875094737 |
| C | -0.32201806983044 | -0.87062848718780 | -8.64415284753082 |
| C | -1.31299946166774 | -3.16784007310817 | -8.50429633323179 |
| C | 0.56866068633274  | -2.54911334560250 | -6.96979875598533 |

|    |                   |                   |                   |
|----|-------------------|-------------------|-------------------|
| H  | -3.79661483639864 | -0.82084463409115 | -2.44046042302866 |
| H  | -4.61371543080742 | 0.74134629231614  | -2.58306803809841 |
| H  | -5.58108730240302 | 0.11982631694457  | -4.73853376616826 |
| H  | -5.72995105887246 | -1.39152075295981 | -3.83743173514280 |
| H  | -4.37390312442875 | -1.27158140703139 | -6.23368912788494 |
| H  | -3.82486441866177 | -2.35414340087561 | -4.93862951240487 |
| H  | -2.00687271270952 | 0.52155562652171  | -3.36140639220981 |
| H  | -3.13073724818468 | 1.45913450595286  | -4.35945218165766 |
| H  | -2.20964246993171 | -2.82575883418952 | -9.02744436048748 |
| H  | -1.58277334922912 | -4.00340231236567 | -7.85370059410483 |
| H  | -0.60726588882494 | -3.53486084022027 | -9.25001382533252 |
| H  | -1.21229969204600 | -0.51557680228438 | -9.16748000449629 |
| H  | 0.40440820215849  | -1.21021323380336 | -9.38530125380936 |
| H  | 0.11510475955855  | -0.03273236244871 | -8.09972736216614 |
| H  | 1.04312500123447  | -1.76268116866075 | -6.38123760679054 |
| H  | 1.29502945635771  | -2.91168065905913 | -7.69966325198824 |
| H  | 0.30639386181809  | -3.37128720904050 | -6.30068296536779 |
| H  | -2.58135465448645 | -2.13818806263663 | -6.81245466691092 |
| Au | -0.07076487856877 | 0.52224773672593  | -5.43121404630814 |
| Cl | 1.78501938903424  | 1.89479173134981  | -5.00910467116720 |

31

3TS

|    |                   |                   |                   |
|----|-------------------|-------------------|-------------------|
| Au | -0.19047824466350 | 0.30464009989539  | -0.01272106434452 |
| C  | -0.02775604402708 | 0.15881683102168  | 1.97357718173697  |
| N  | 0.19018504672474  | -1.08486331064713 | 2.65330388605579  |
| C  | -0.85464062769373 | -2.10090849661841 | 2.38811735301324  |

|    |                   |                   |                   |
|----|-------------------|-------------------|-------------------|
| C  | -0.24068501053451 | -3.37600402227634 | 2.97732455247871  |
| C  | 1.28938039507643  | -3.18366486526380 | 2.81490549130158  |
| C  | 1.45471262609600  | -1.75616488708460 | 2.26372788906717  |
| N  | -0.08574436852255 | 1.13482044958182  | 2.84181009710249  |
| C  | -0.29682152998085 | 2.60545887644552  | 2.64714204913906  |
| C  | 0.83805456421697  | 3.18961728948949  | 1.79678267570959  |
| C  | -0.26544909982816 | 3.21078265713178  | 4.05639421348522  |
| C  | -1.66467269889113 | 2.85486081135625  | 1.99834887804643  |
| H  | -0.50321094597033 | -3.46887597363044 | 4.03163870391458  |
| H  | -0.61110893019053 | -4.26392570937368 | 2.46483238546219  |
| H  | 1.72660445608290  | -3.90971296524248 | 2.12922659127155  |
| H  | 1.79687905170519  | -3.29144642949116 | 3.77348388211961  |
| H  | 1.56427534712948  | -1.76739881526050 | 1.17102278989176  |
| H  | 2.30844878865342  | -1.22538988868193 | 2.68624219972758  |
| H  | -1.79370035366265 | -1.81236080833964 | 2.86086738329060  |
| H  | -1.03021632914764 | -2.20789827650742 | 1.30886656290220  |
| H  | 0.69839780202047  | 3.03850263031584  | 4.54344248558945  |
| H  | -1.05625380883393 | 2.79318161516069  | 4.68506741125264  |
| H  | -0.42022513397082 | 4.28823910522357  | 3.99800833238585  |
| H  | 1.81043435163126  | 2.98478859829895  | 2.25006527303258  |
| H  | 0.71529019278410  | 4.27174035388480  | 1.72153677646841  |
| H  | 0.83045341464224  | 2.77305203689480  | 0.79004585645073  |
| H  | -1.71308685571869 | 2.42098240655570  | 1.00016196305013  |
| H  | -1.83537006536381 | 3.92966550908122  | 1.91437441813727  |
| H  | -2.46678498291337 | 2.42598082864659  | 2.60268563216642  |
| H  | 0.02784565955215  | 0.82718823058406  | 3.80625107115912  |
| Cl | -0.34414444368600 | 0.44532039660897  | -2.31168066523662 |

43

3A3

|   |                   |                   |                   |
|---|-------------------|-------------------|-------------------|
| C | -2.82814833864466 | -0.63582328030008 | -3.14796692121810 |
| C | -2.37381275938125 | -0.26831405282663 | -4.56575362165608 |
| C | -0.84640725304980 | -0.35387901749581 | -4.48778827003378 |
| N | -0.53604844680812 | -0.06323940595354 | -3.06850005539873 |
| C | -1.77682699637105 | 0.03143827189049  | -2.26344305881123 |
| C | 0.69217613650305  | 0.08722565917301  | -2.57641720675717 |
| N | 1.70587633937261  | -0.05308226084558 | -3.43633894733988 |
| C | 3.17845385250286  | 0.05013075216181  | -3.20288783667744 |
| C | 3.55465428395868  | 1.46268009555124  | -2.73601401365410 |
| C | 3.82144549895590  | -0.22440236005843 | -4.56953410361511 |
| C | 3.64680197483915  | -1.01091327037092 | -2.19826871139777 |
| H | -2.80191180941495 | -1.71926971233066 | -3.00831213079284 |
| H | -3.83398097285880 | -0.28608008427578 | -2.91771350590067 |
| H | -2.67679686547848 | 0.75338234005256  | -4.80434043966407 |
| H | -2.77714968003666 | -0.92850403933310 | -5.33284215252299 |
| H | -0.35786145452843 | 0.37051664150887  | -5.14398865094119 |
| H | -0.48450814205250 | -1.35463210624828 | -4.74386963707195 |
| H | -1.63934428255702 | -0.46290034436948 | -1.30441332190392 |
| H | -2.01800079730855 | 1.08224627667435  | -2.08407844673462 |
| H | 3.49562501062497  | 0.50862261349864  | -5.31216117081467 |
| H | 3.56614335065171  | -1.22499347542534 | -4.92783475290333 |
| H | 4.90680042753563  | -0.16246104597081 | -4.48630593108194 |
| H | 3.21883875667379  | 2.20982894714469  | -3.45828362204454 |

|    |                   |                   |                   |
|----|-------------------|-------------------|-------------------|
| H  | 4.63911599420067  | 1.53982303725929  | -2.63552280617570 |
| H  | 3.10801636316181  | 1.69385267993148  | -1.76804528035641 |
| H  | 3.19936331008142  | -0.85704218989945 | -1.21560717121090 |
| H  | 4.73193111262544  | -0.95790138972472 | -2.08770096203808 |
| H  | 3.38276057881770  | -2.01227678992290 | -2.54535045840737 |
| H  | 1.47410587712713  | -0.27167889426791 | -4.39587225715369 |
| Au | 0.93204026290326  | 0.51024665589899  | -0.60646292571905 |
| Cl | 1.17570077262450  | 0.99119028258910  | 1.69345034566050  |
| I  | -0.33874952495197 | -1.24280161360729 | 3.07097787591847  |
| N  | -1.38964660413318 | -2.78557052707052 | 4.06039761343237  |
| C  | -0.81444258257014 | -3.59254047679646 | 5.03609797501970  |
| C  | -1.86850243183360 | -4.57838586070612 | 5.51144994178330  |
| C  | -3.12579349235290 | -4.24006145352481 | 4.70546829100428  |
| C  | -2.72018541378773 | -3.08975827623561 | 3.79850170671067  |
| H  | -1.50004854934746 | -5.58974299182142 | 5.33335460713193  |
| H  | -1.99675665835745 | -4.45795047538537 | 6.58796714194580  |
| H  | -3.96100233463950 | -3.91186664986609 | 5.32580918749332  |
| H  | -3.47900662355130 | -5.06447021802652 | 4.08512445314995  |
| O  | 0.33057294428586  | -3.50839356819635 | 5.42422659277506  |
| O  | -3.41949083343062 | -2.52324842247853 | 2.98579263797198  |

43

3A3TS

|   |           |           |          |
|---|-----------|-----------|----------|
| C | -0.120430 | 0.056897  | 2.107794 |
| N | 0.189408  | -1.184210 | 2.735481 |
| C | -0.728915 | -2.291554 | 2.372709 |
| C | -0.001445 | -3.535812 | 2.905137 |
| C | 1.498436  | -3.140626 | 2.932675 |



|    |           |           |           |
|----|-----------|-----------|-----------|
| C  | 1.538356  | -1.703662 | 2.394462  |
| N  | -0.260858 | 1.009296  | 2.980369  |
| C  | -0.555636 | 2.473361  | 2.814591  |
| C  | 0.595720  | 3.144580  | 2.056264  |
| C  | -0.643436 | 3.029229  | 4.241211  |
| C  | -1.895761 | 2.666061  | 2.094569  |
| H  | -0.350916 | -3.782888 | 3.907404  |
| H  | -0.194409 | -4.396290 | 2.264494  |
| H  | 2.116485  | -3.798708 | 2.321779  |
| H  | 1.884363  | -3.174529 | 3.951770  |
| H  | 1.690862  | -1.697167 | 1.306094  |
| H  | 2.309602  | -1.086224 | 2.854870  |
| H  | -1.708277 | -2.131608 | 2.823064  |
| H  | -0.853848 | -2.348854 | 1.282489  |
| H  | 0.293920  | 2.875611  | 4.781673  |
| H  | -1.453841 | 2.553471  | 4.797785  |
| H  | -0.839834 | 4.100646  | 4.202713  |
| H  | 1.541757  | 3.002380  | 2.582483  |
| H  | 0.399274  | 4.214875  | 1.977278  |
| H  | 0.693115  | 2.742121  | 1.048065  |
| H  | -1.854872 | 2.309543  | 1.065403  |
| H  | -2.138296 | 3.729761  | 2.077435  |
| H  | -2.694955 | 2.137015  | 2.616657  |
| H  | -0.133673 | 0.703958  | 3.944446  |
| Au | -0.283109 | 0.235597  | 0.111069  |
| Cl | -0.486035 | 0.355494  | -2.241706 |
| I  | 1.103624  | 2.830630  | -3.079335 |
| N  | 2.175997  | 4.538775  | -3.697526 |
| C  | 3.365089  | 4.471758  | -4.416251 |

|   |          |          |           |
|---|----------|----------|-----------|
| C | 3.813612 | 5.893020 | -4.712977 |
| C | 2.751289 | 6.791239 | -4.071582 |
| C | 1.747703 | 5.837254 | -3.446270 |
| H | 4.811327 | 6.035202 | -4.296904 |
| H | 3.885404 | 6.014095 | -5.794730 |
| H | 2.226857 | 7.420874 | -4.792151 |
| H | 3.145796 | 7.440376 | -3.289421 |
| O | 3.921083 | 3.448007 | -4.749632 |
| O | 0.742318 | 6.134855 | -2.837749 |
